# Supplementary material for: Effective and novel enantioselective preparation of pyranopyrazoles and pyranocoumarins that is catalyzed by a quinine-derived primary amine
Source: Royal Society of Chemistry journal article supplement (doi:10.1039/c5ob01656h), 2015-10-28
Supplement: c5ob01656h1.pdf [file c5ob01656h1.pdf]

# Enantioselective synthesis of novel pyranopyrazoles and pyranocoumarins using a quinine-derived primary amine salt catalyst

Sai Yang, Liu-lan Shen, Yoon-Jung Kim and Jin-Hyun Jeong\*

*College of Pharmacy and Yonsei Institute of Pharmaceutical Sciences, Yonsei University  
Incheon 406-840, Republic of Korea  
organicjeong@gmail.com*

## Supporting Information

### Contents

|                                                                                |    |
|--------------------------------------------------------------------------------|----|
| Copies of <sup>1</sup> H and <sup>13</sup> C NMR spectra of new compounds..... | 1  |
| Copies of HPLC chromatograms of new compounds.....                             | 17 |
| Copy of x-ray diffraction report (3c) .....                                    | 33 |

# Copies of $^1\text{H}$ and $^{13}\text{C}$ NMR spectra of new compounds

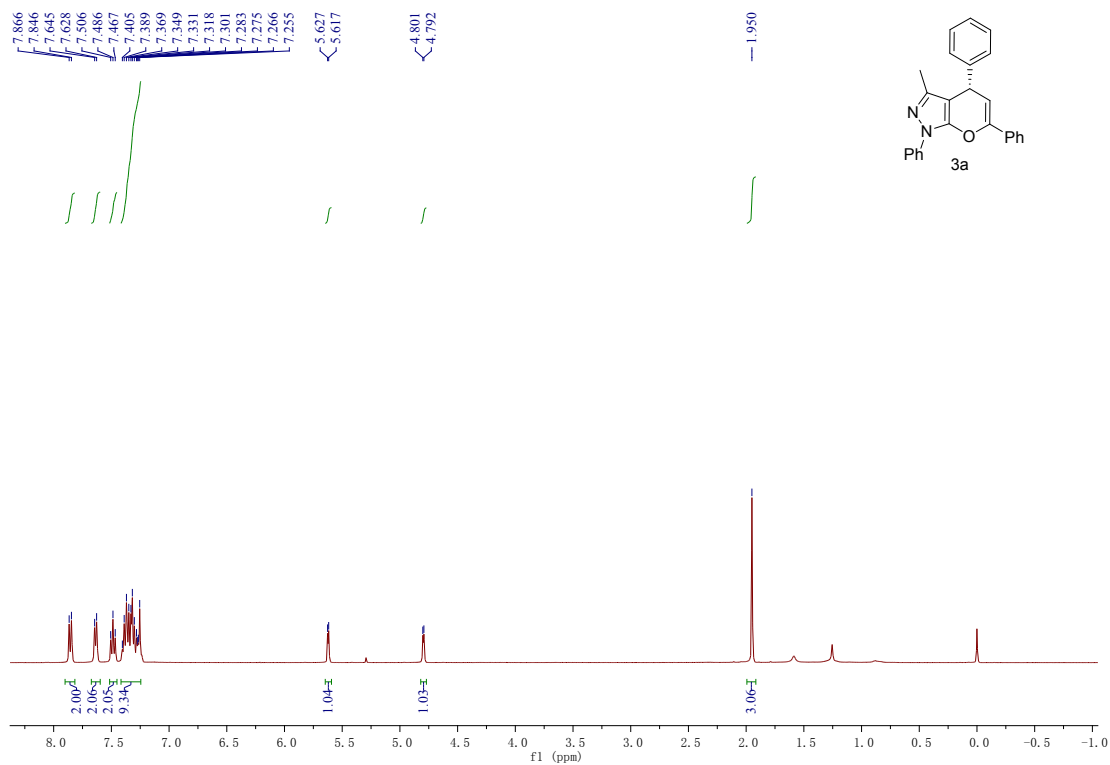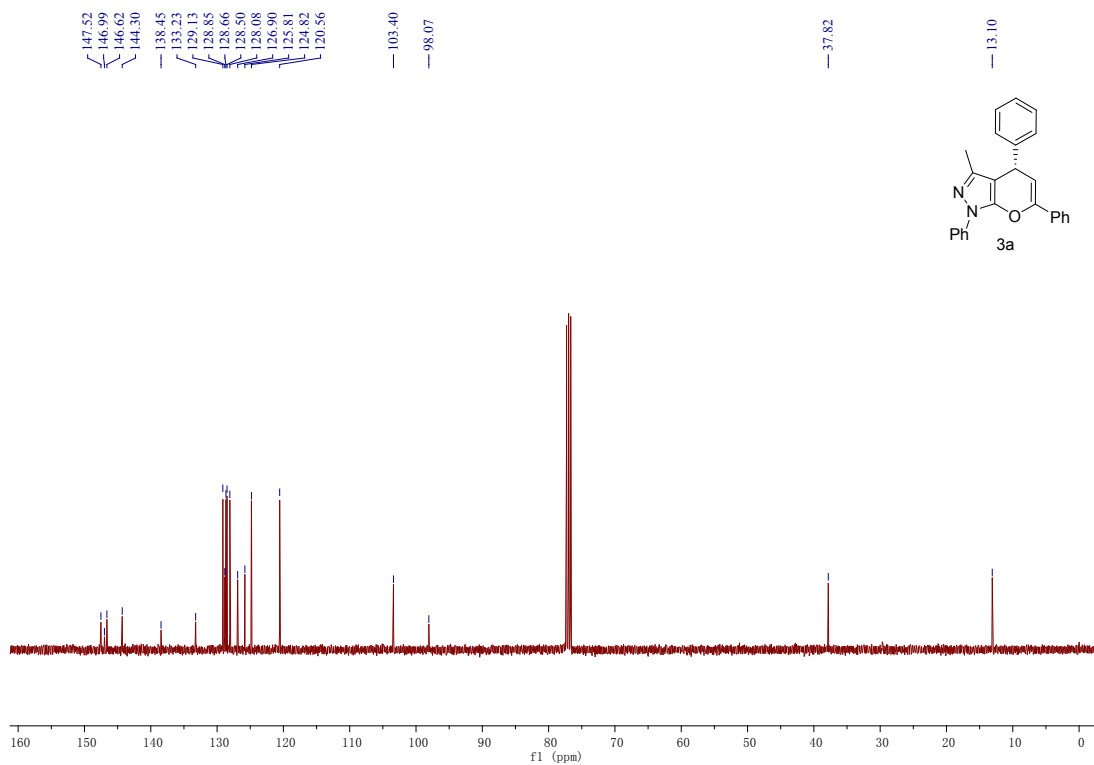

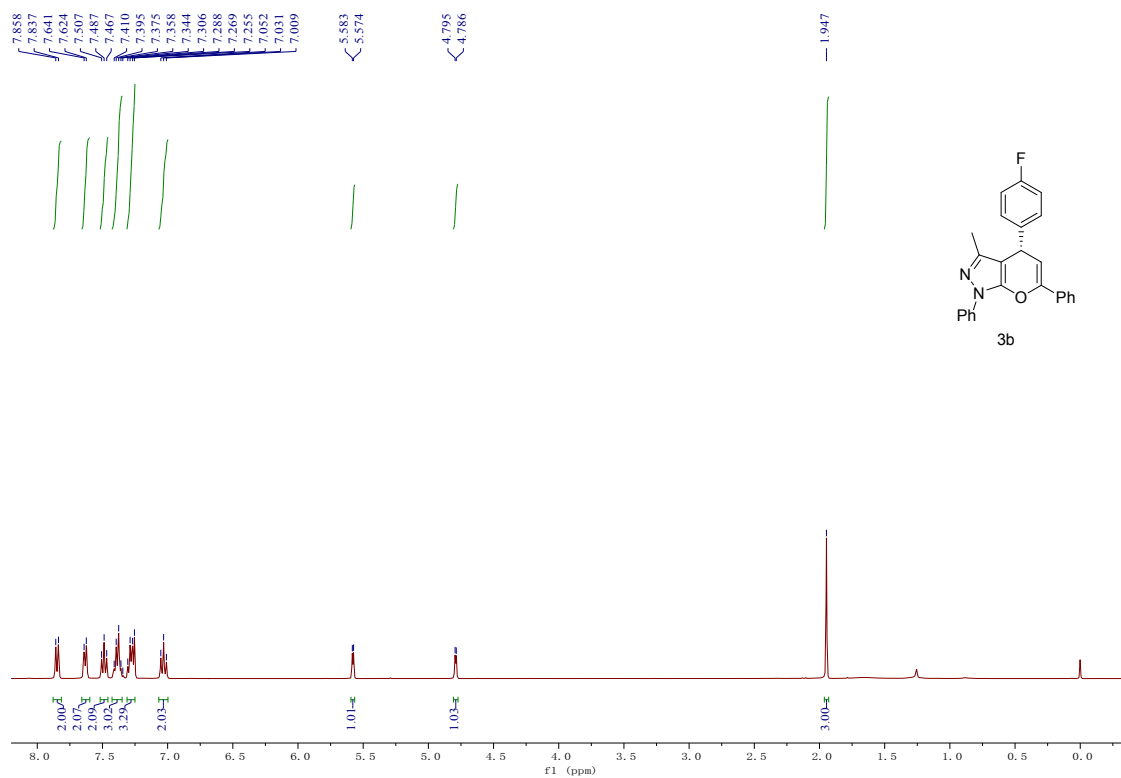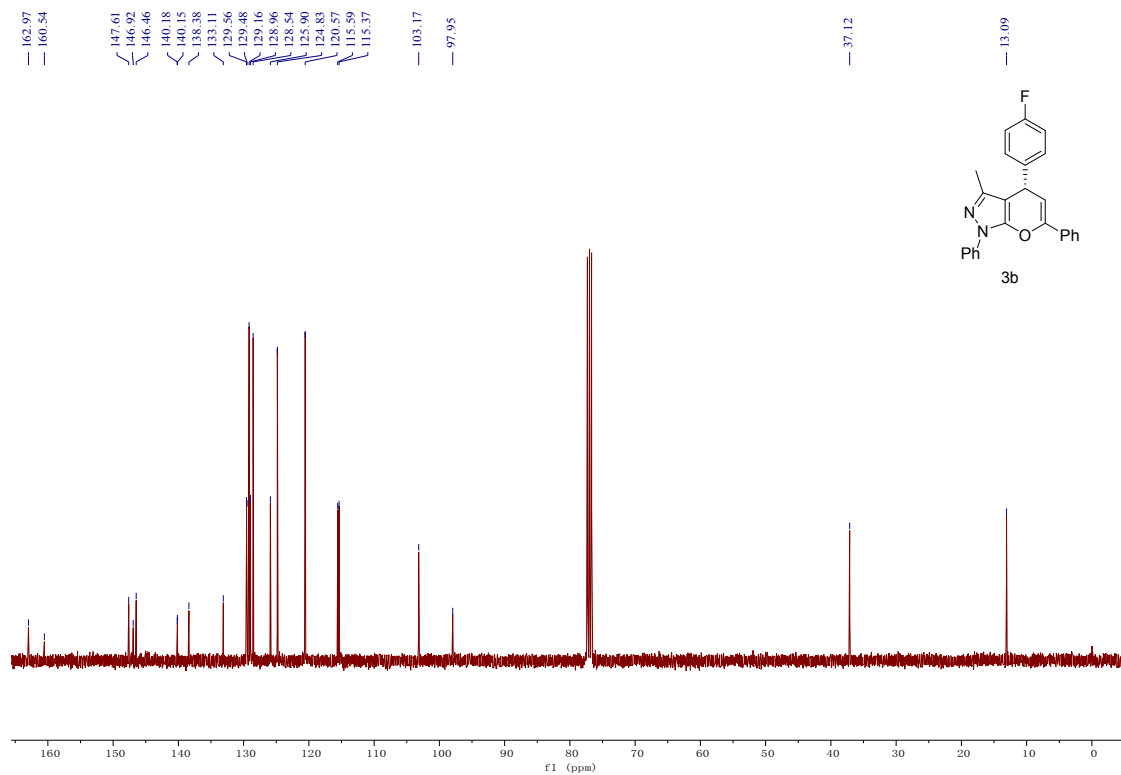

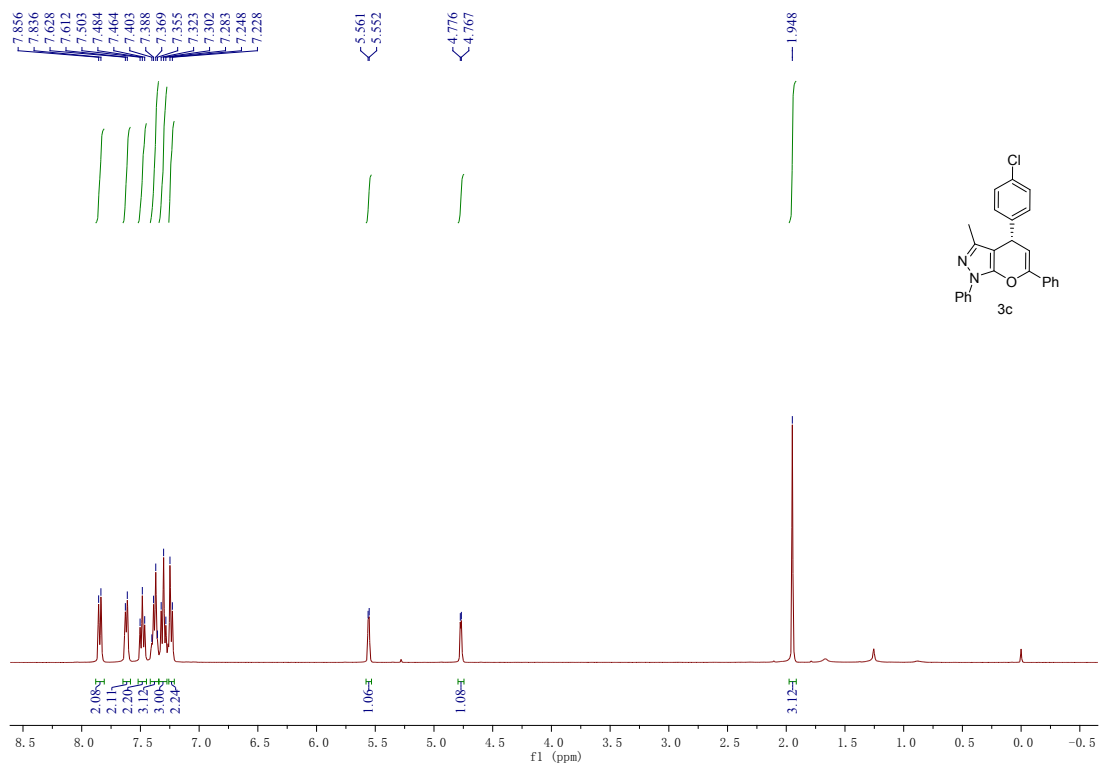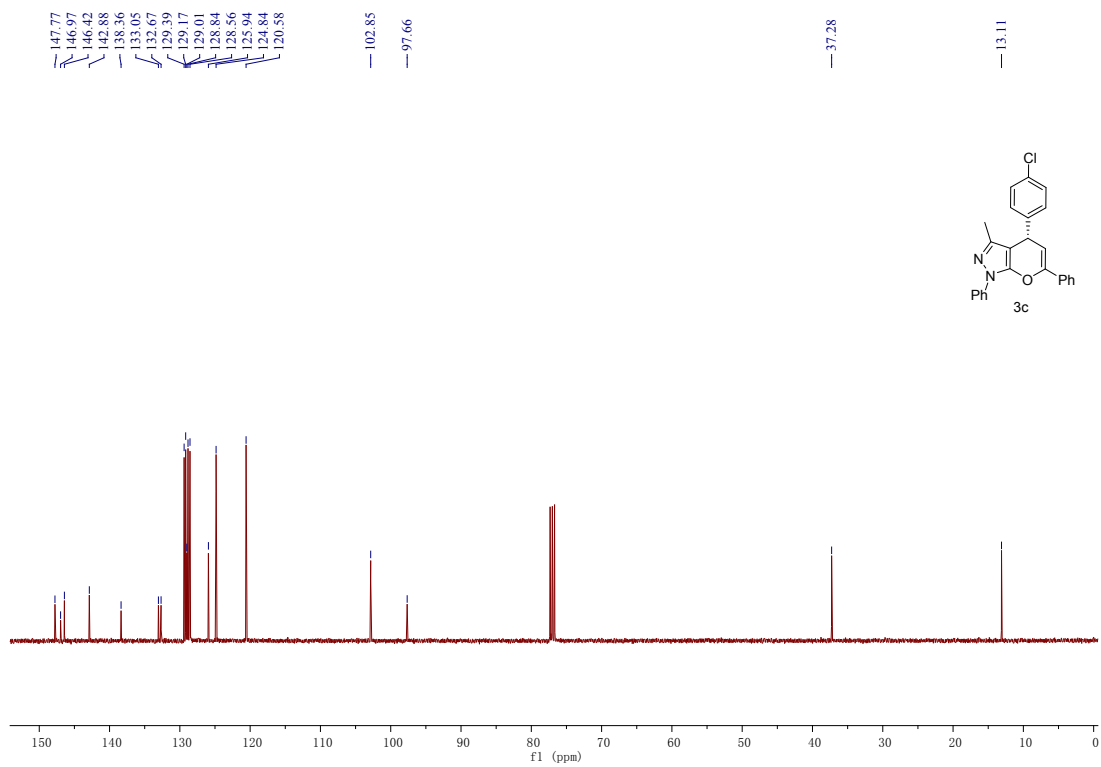

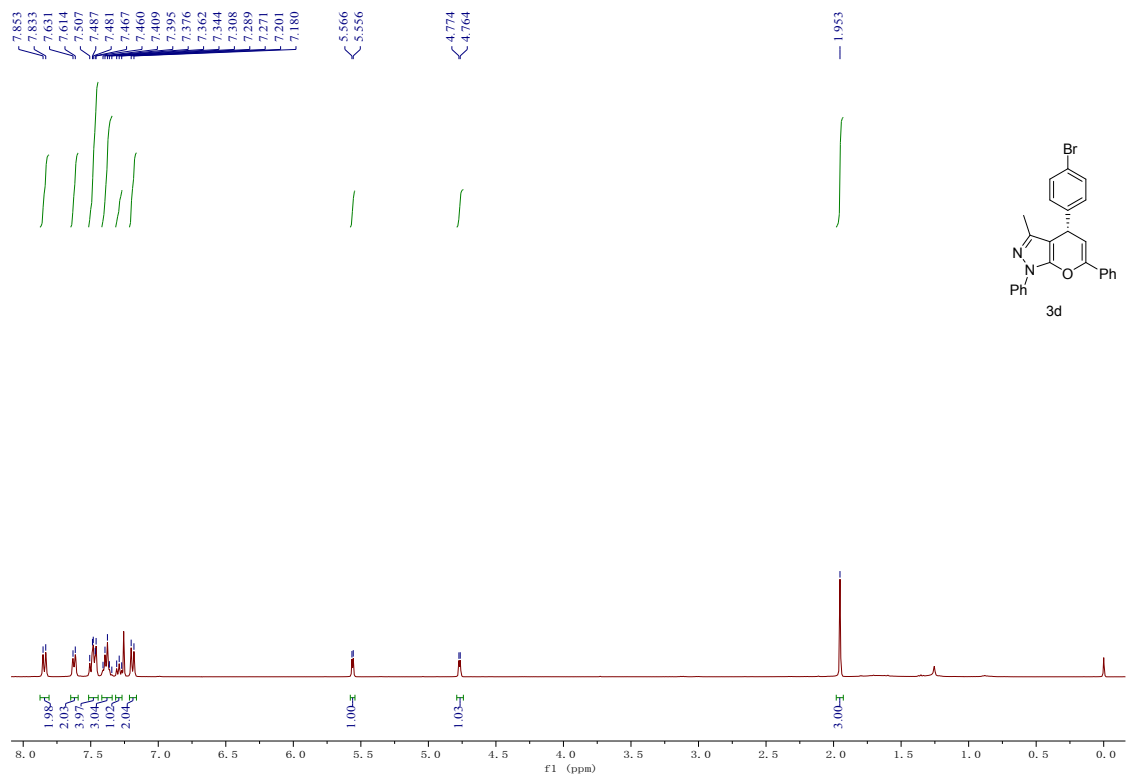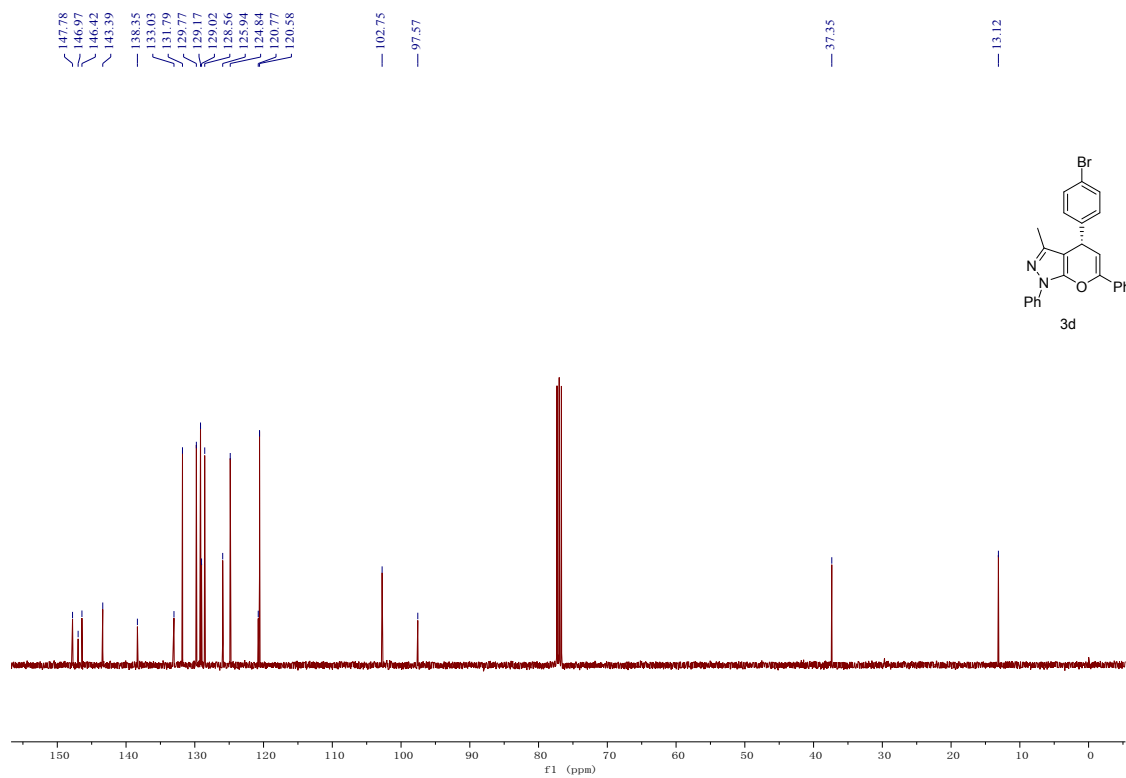

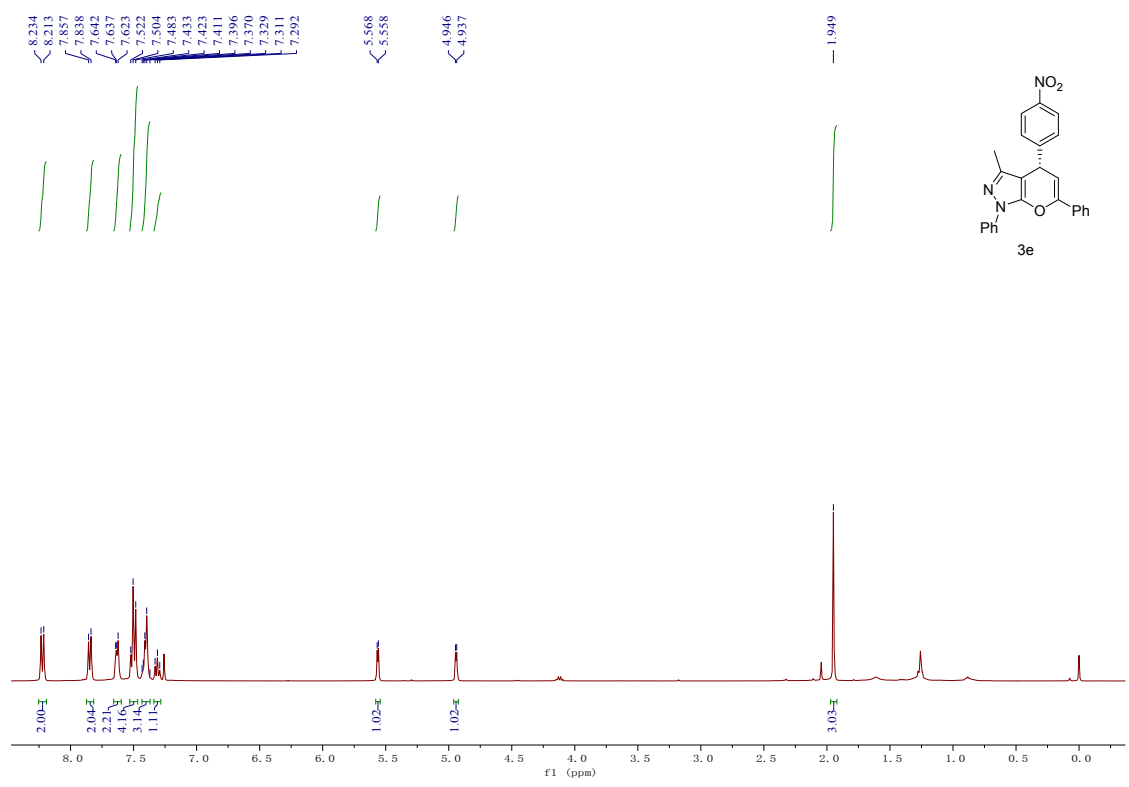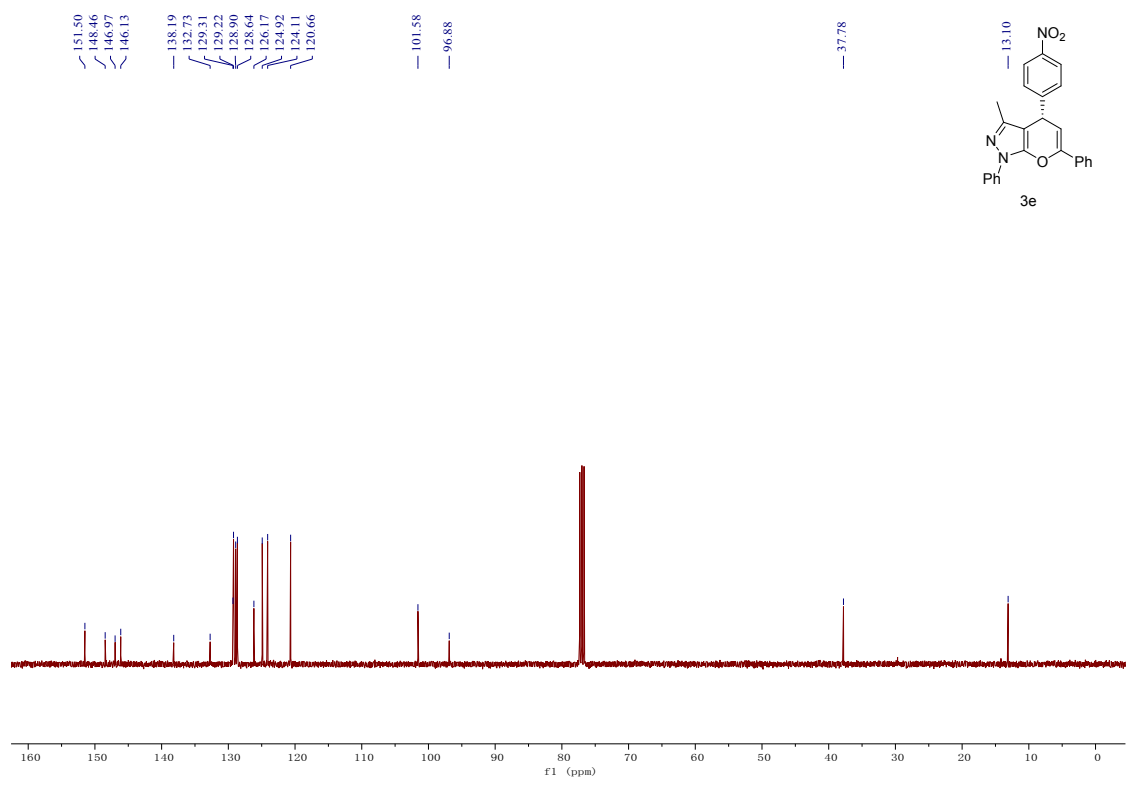

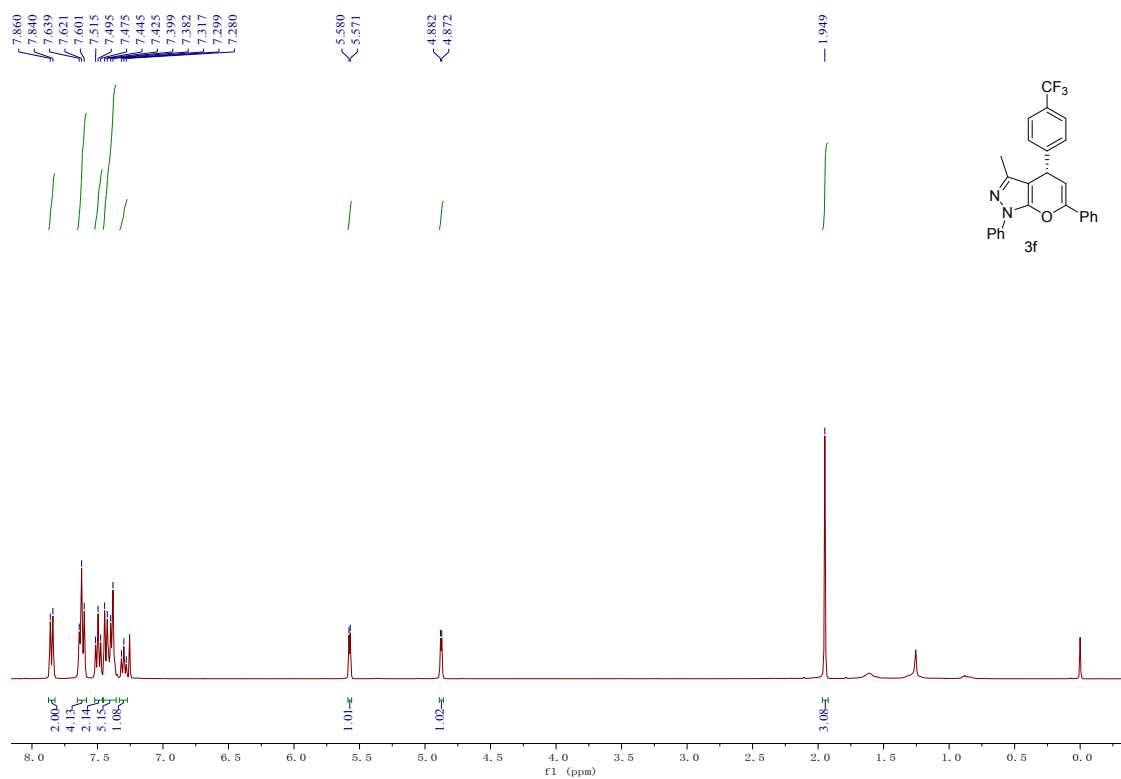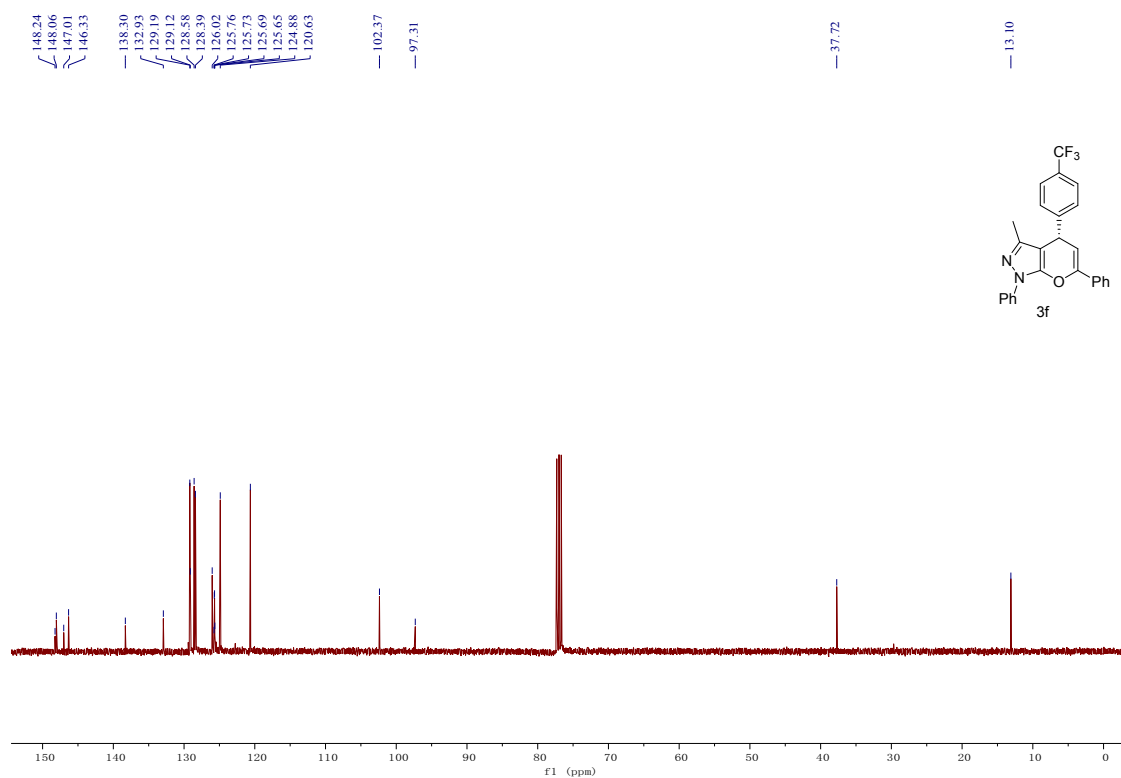

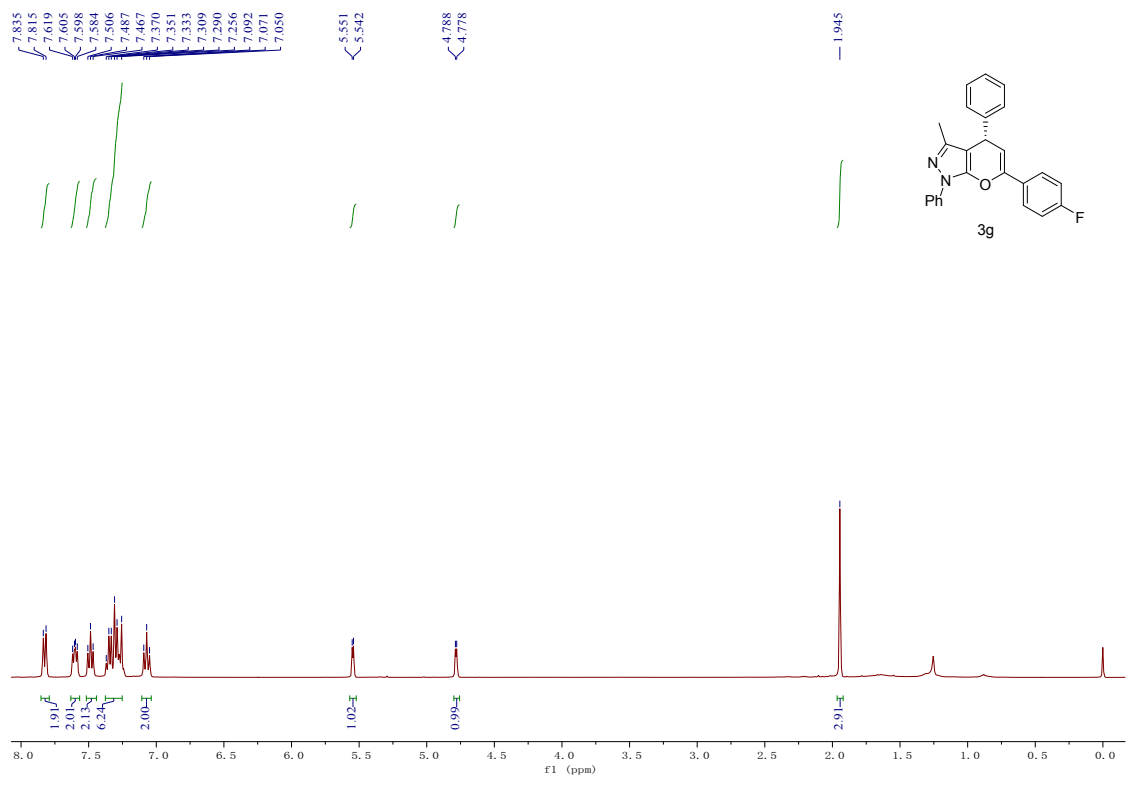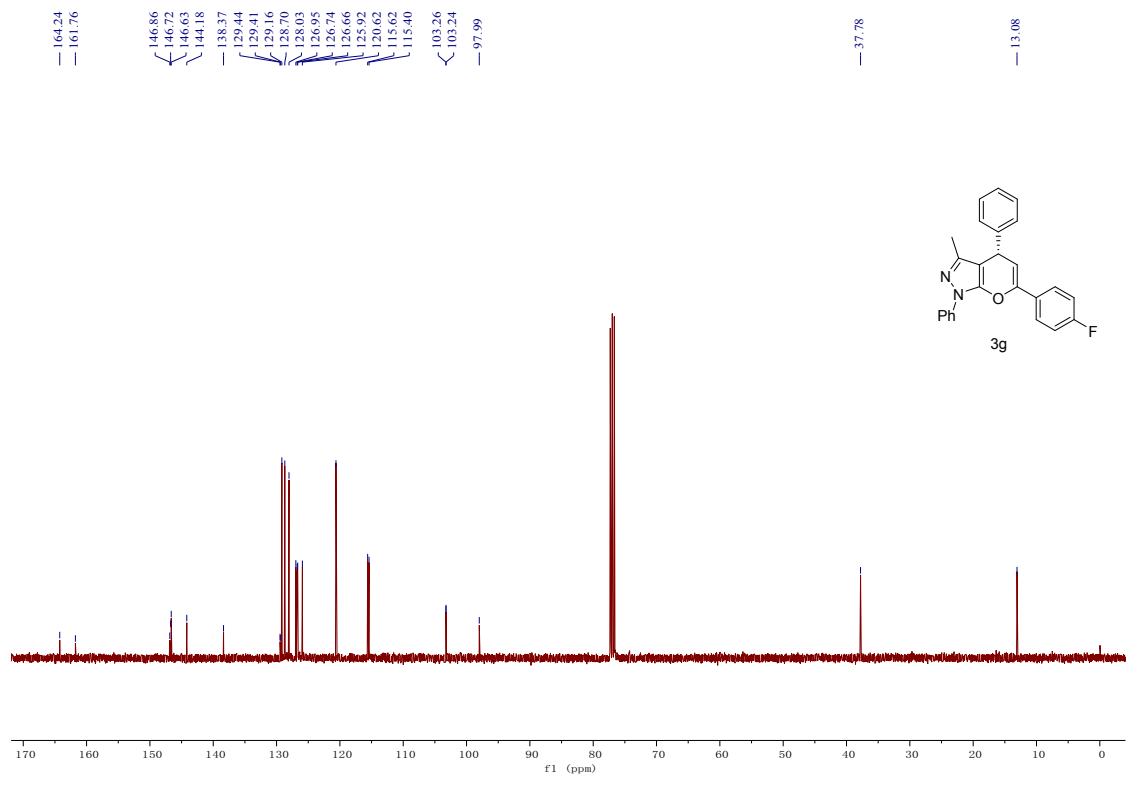



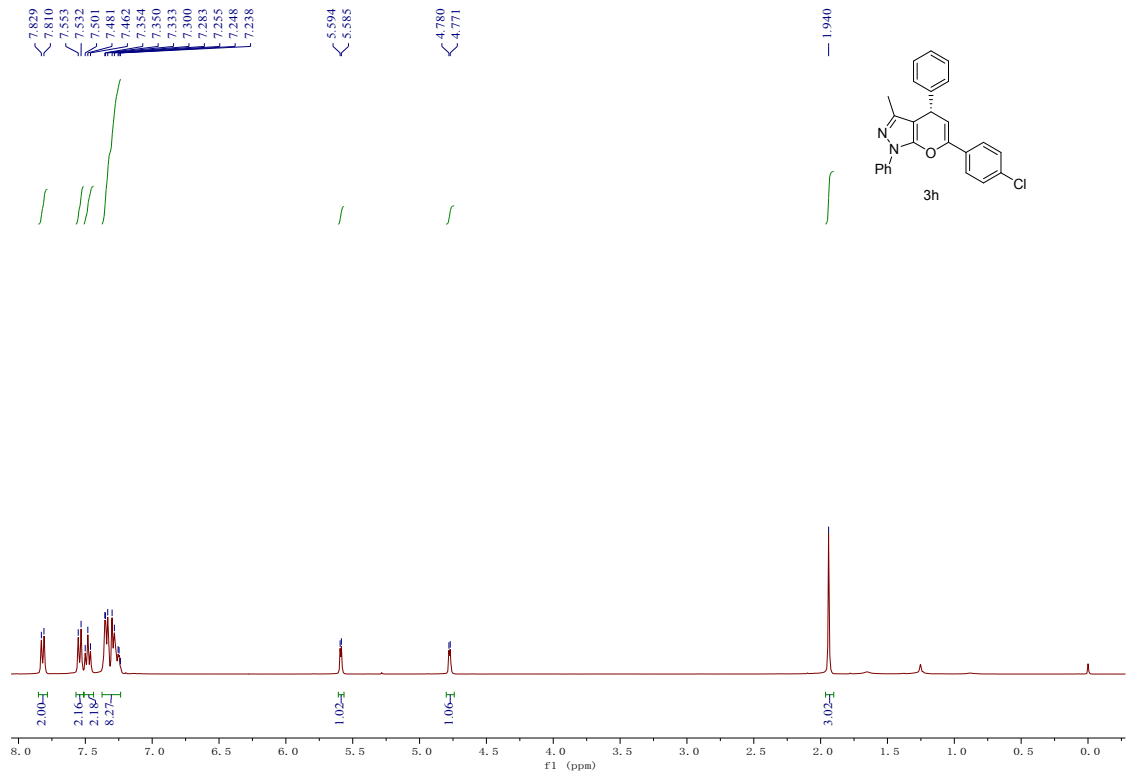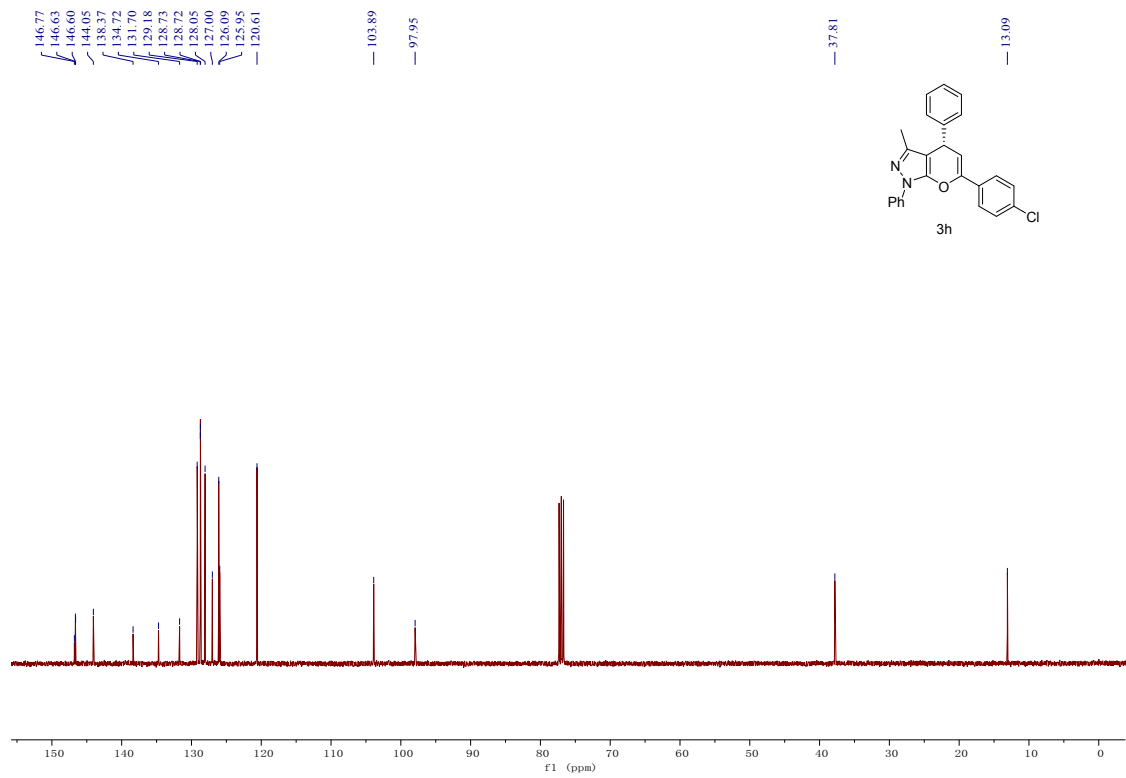

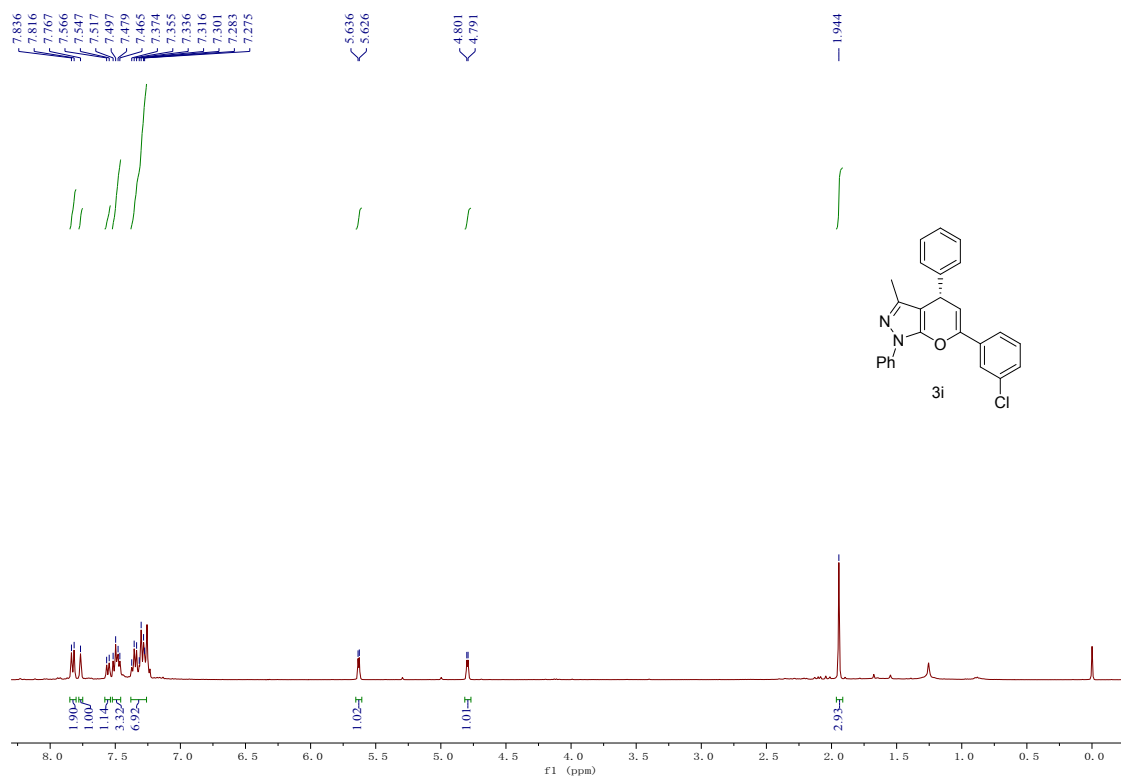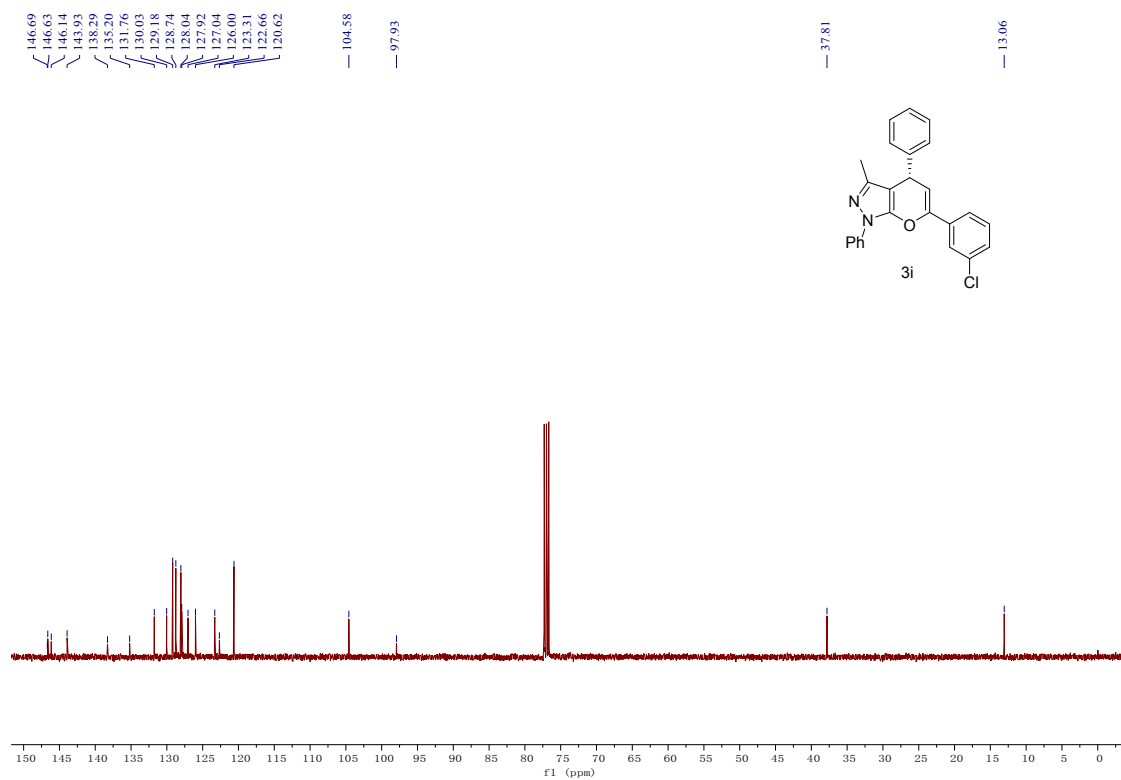

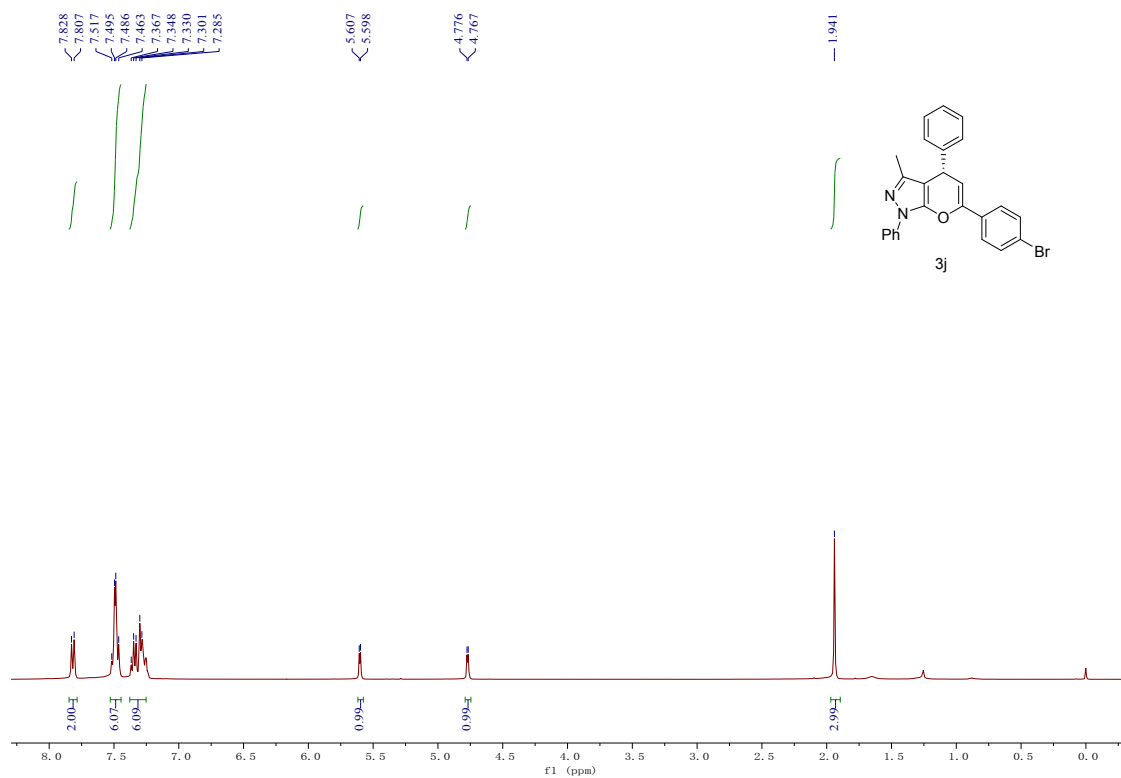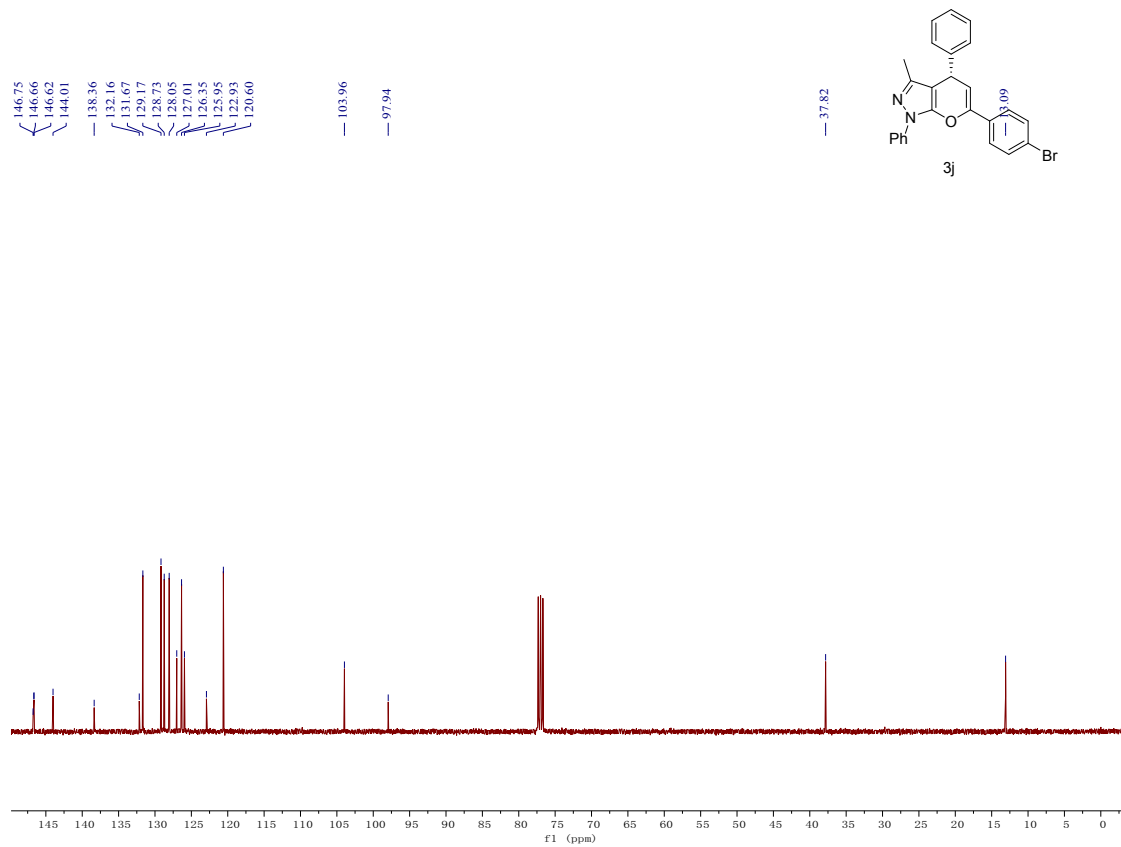

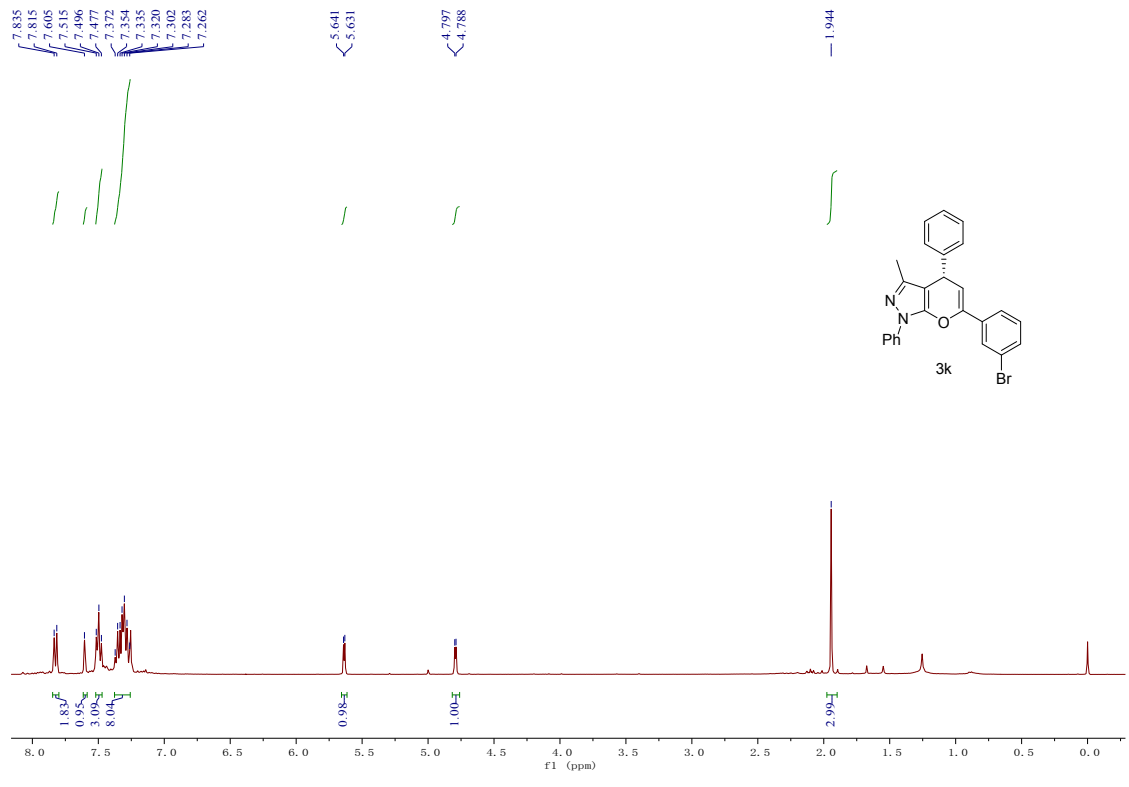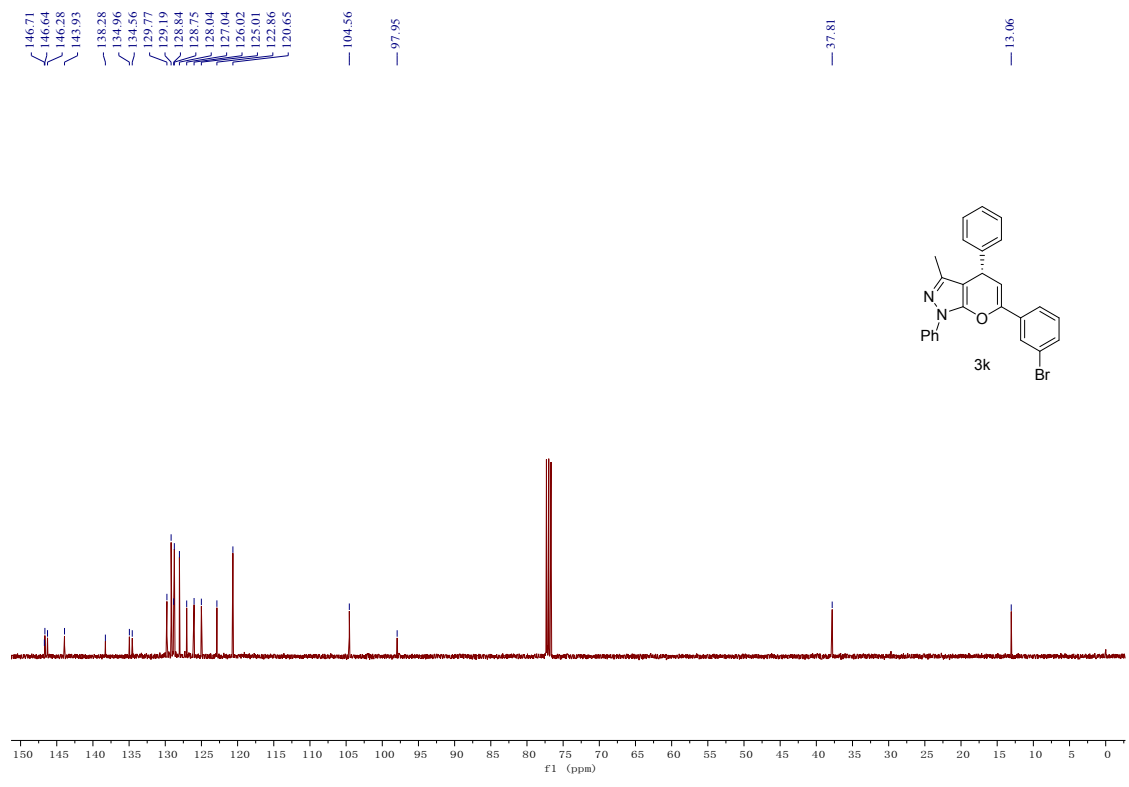

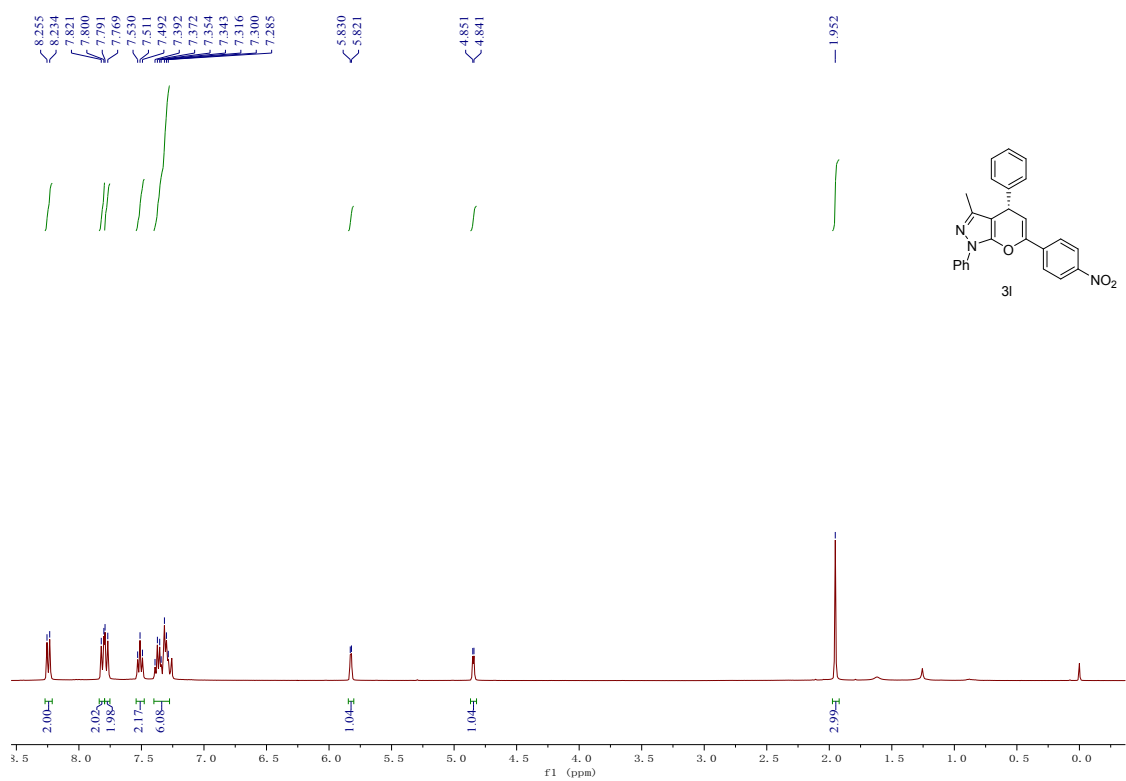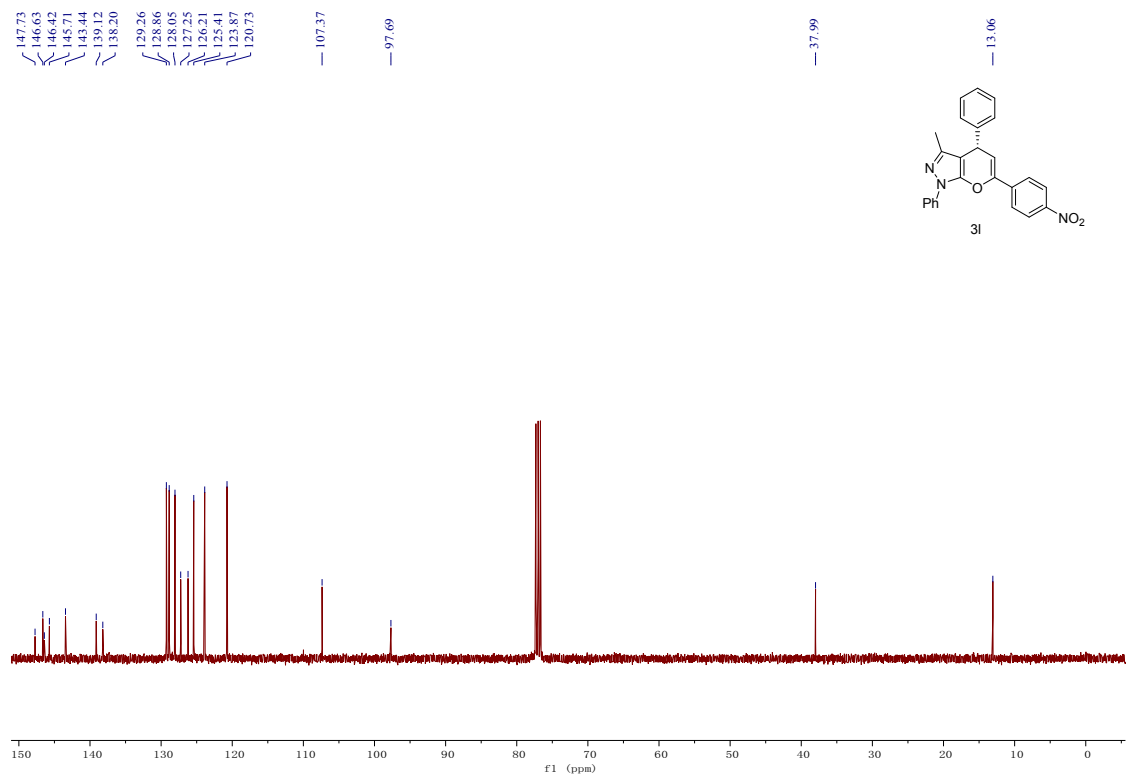

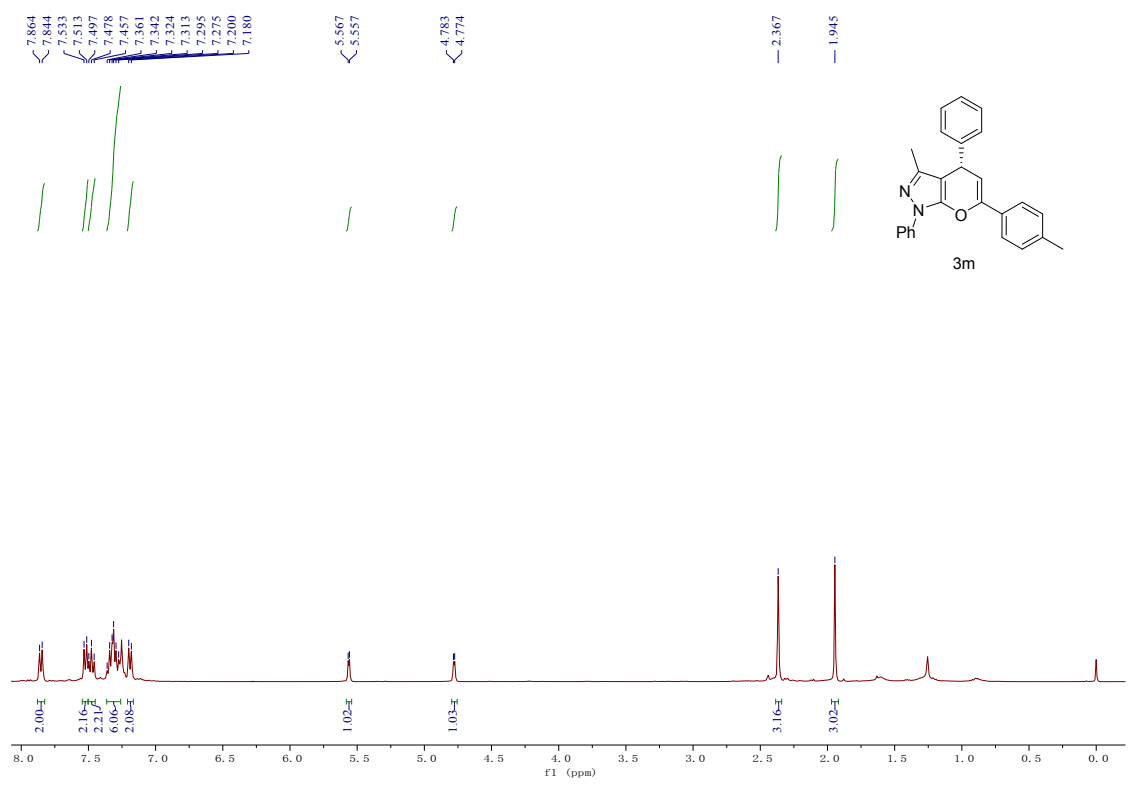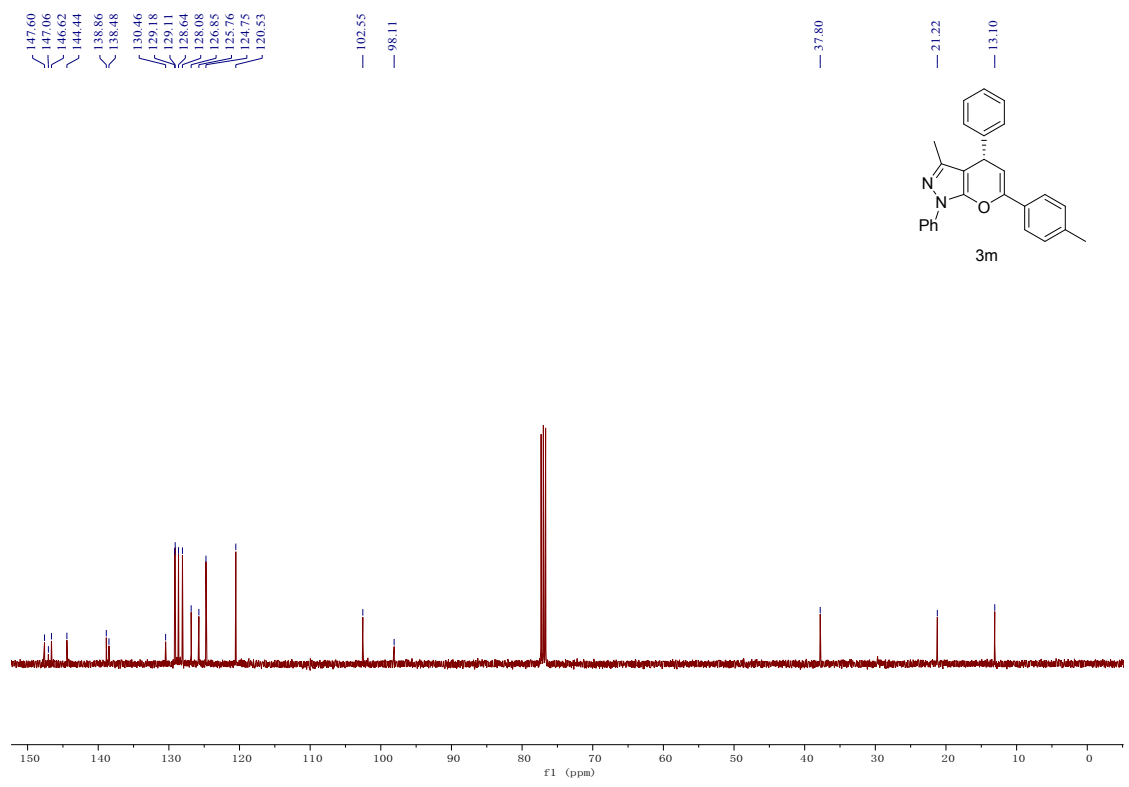

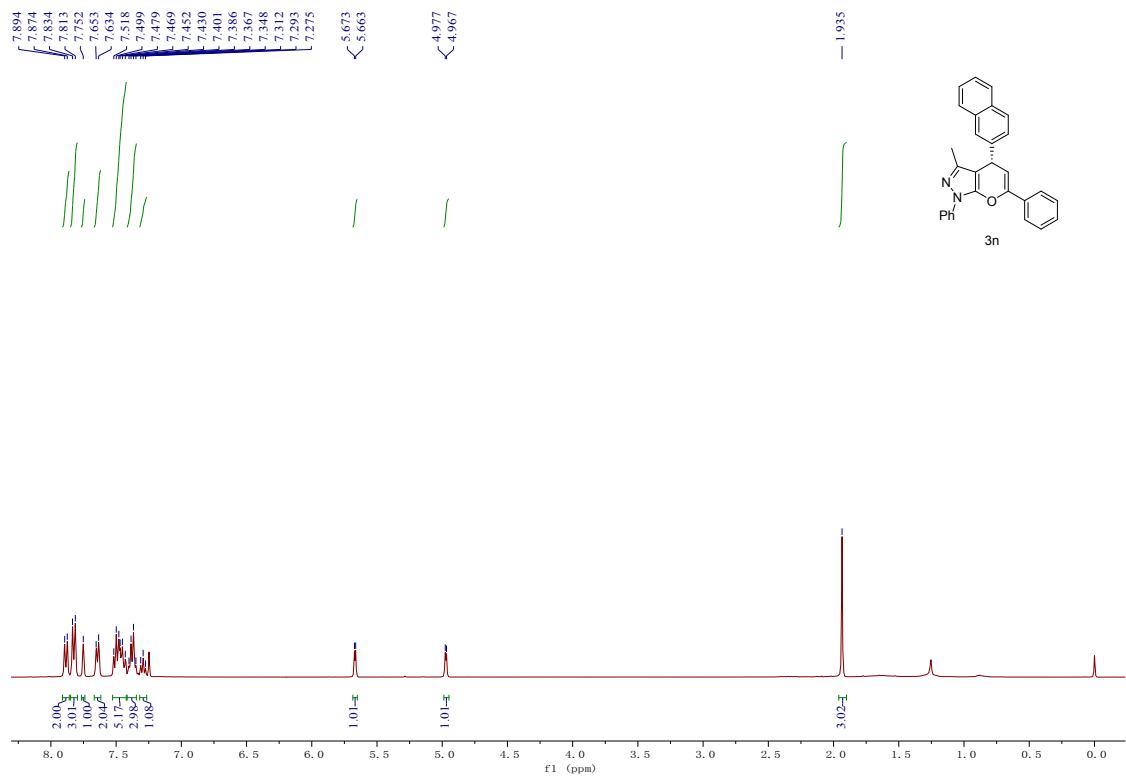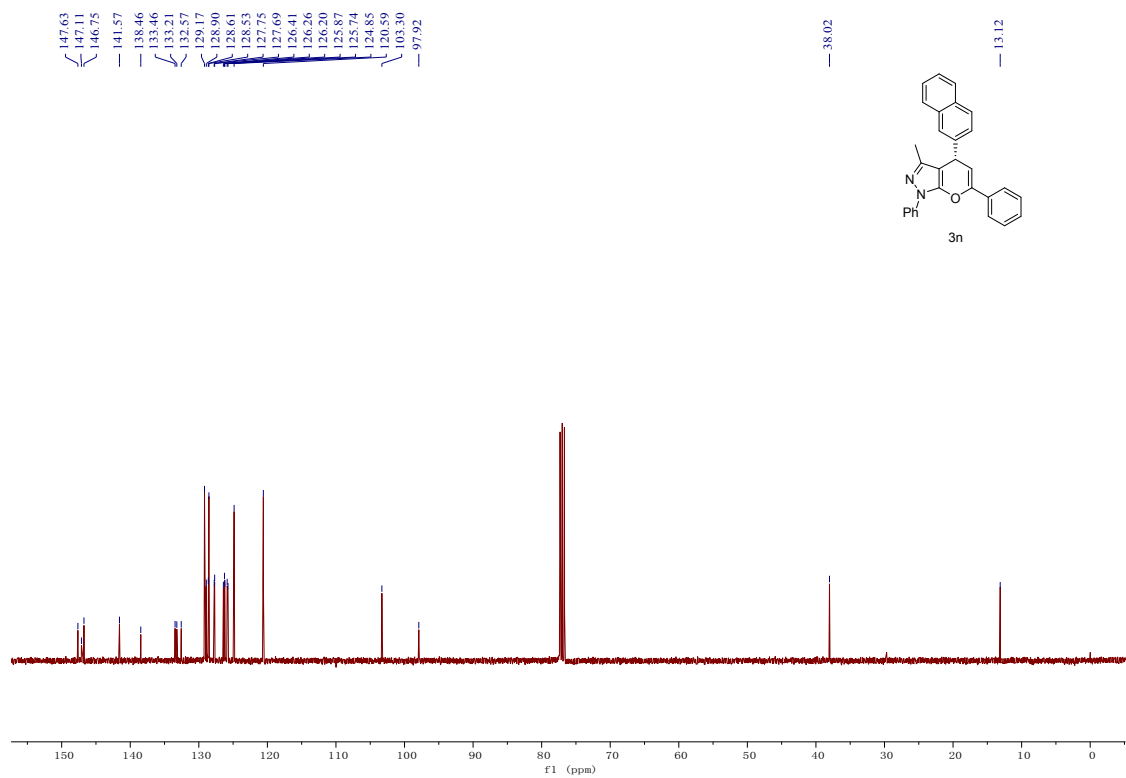

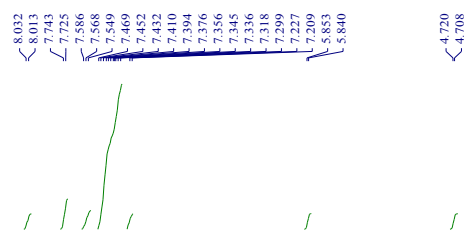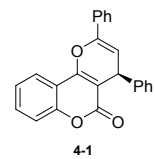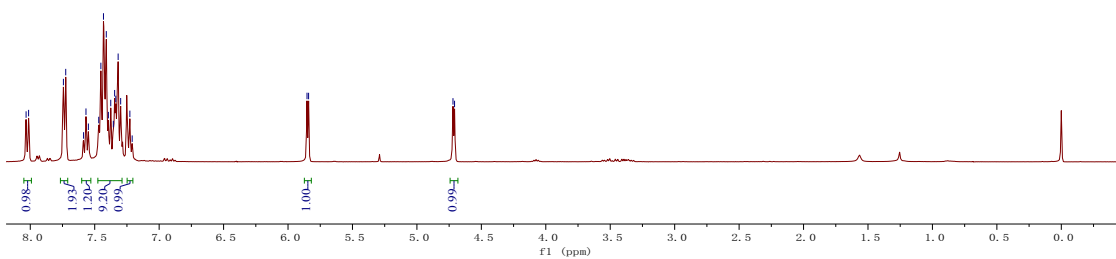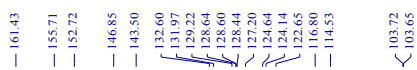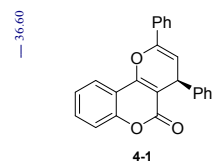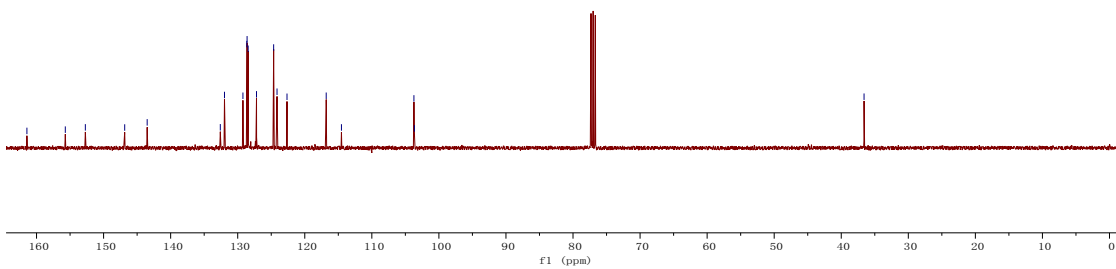



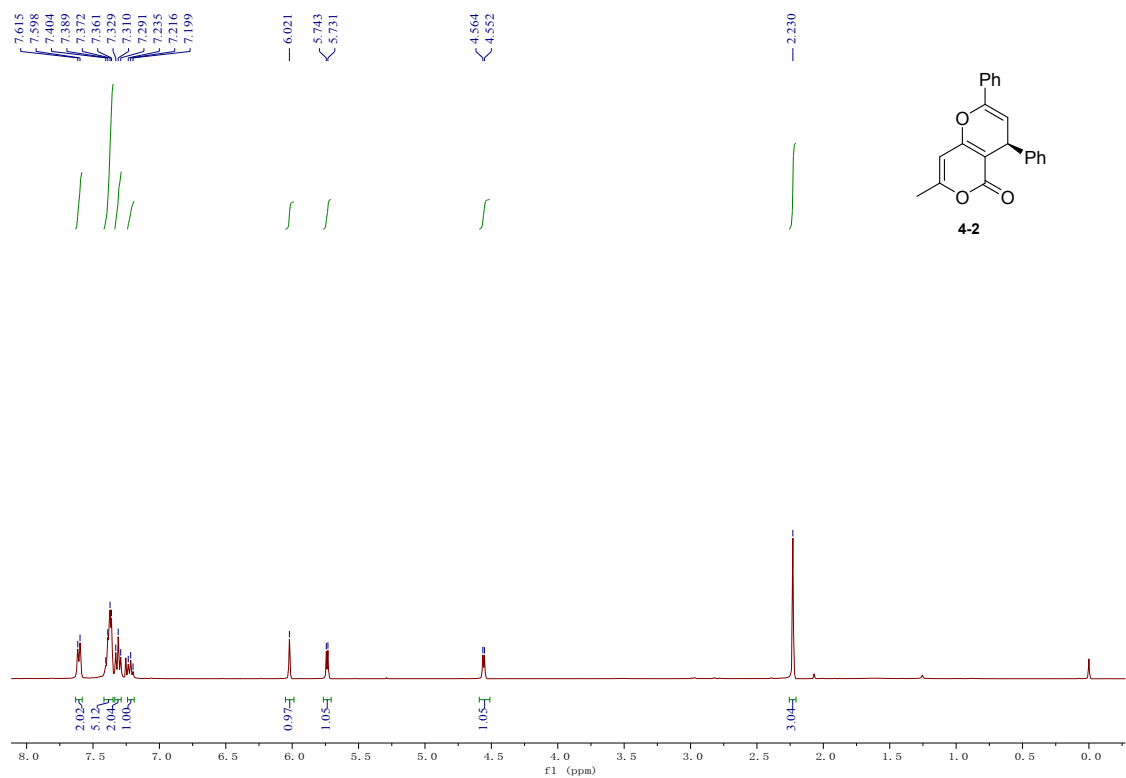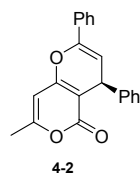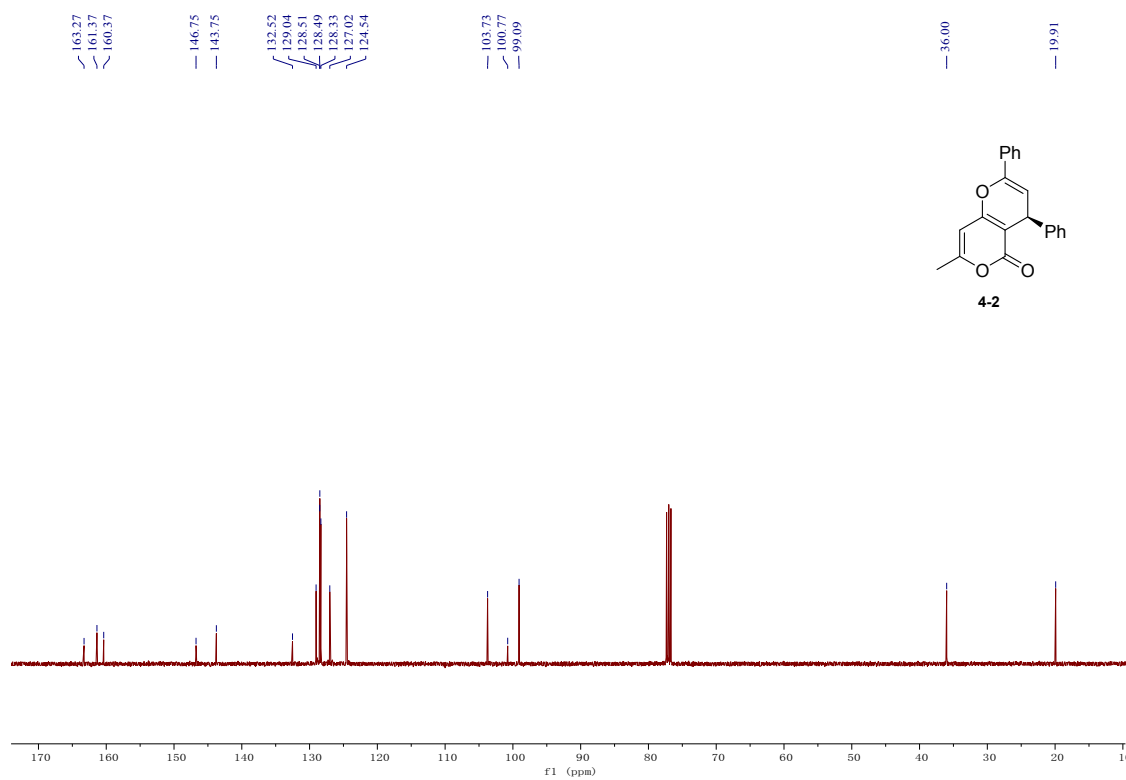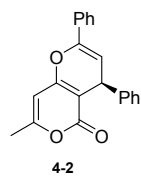

## Copies of HPLC chromatograms of new compounds

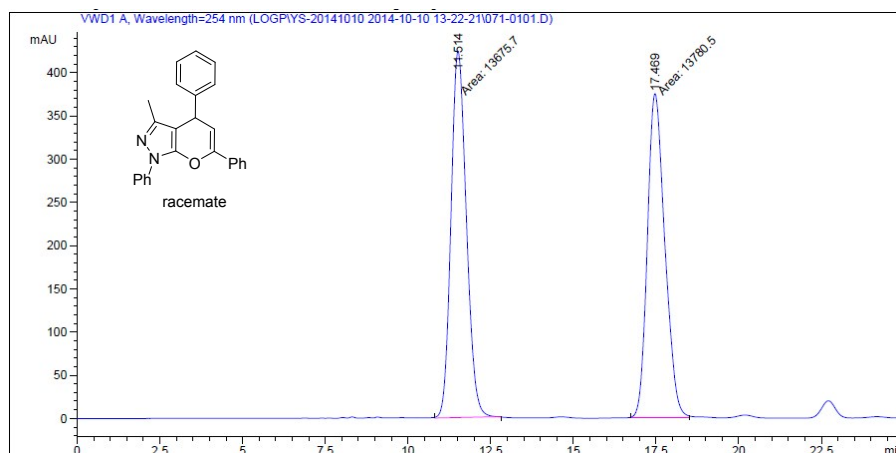

| Peak # | RetTime [min] | Type | Width [min] | Area mAU *s | Height [mAU] | Area %  |
|--------|---------------|------|-------------|-------------|--------------|---------|
| 1      | 11.514        | MM   | 0.5378      | 1.36757e4   | 423.78751    | 49.8092 |
| 2      | 17.469        | MM   | 0.6123      | 1.37805e4   | 375.08987    | 50.1908 |

Totals : 2.74562e4 798.87738

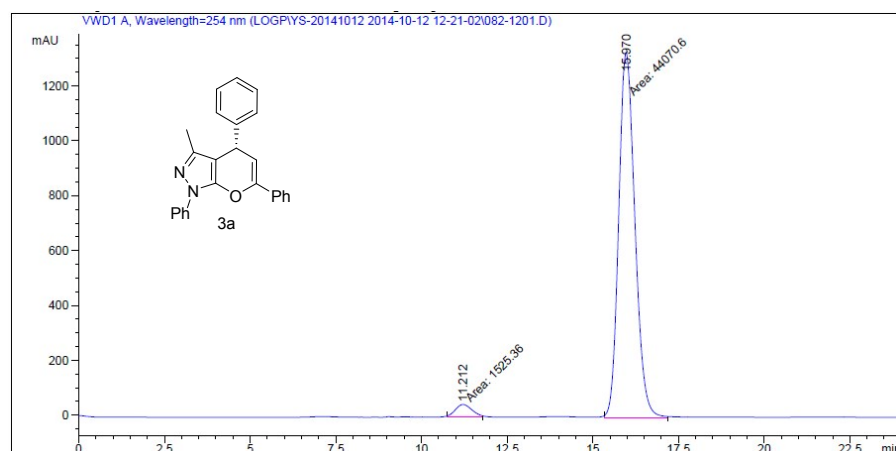

| Peak # | RetTime [min] | Type | Width [min] | Area mAU *s | Height [mAU] | Area %  |
|--------|---------------|------|-------------|-------------|--------------|---------|
| 1      | 11.212        | MM   | 0.5620      | 1525.35840  | 45.23414     | 3.3454  |
| 2      | 15.970        | MM   | 0.5507      | 4.40706e4   | 1333.73535   | 96.6546 |

Totals : 4.55960e4 1378.96949

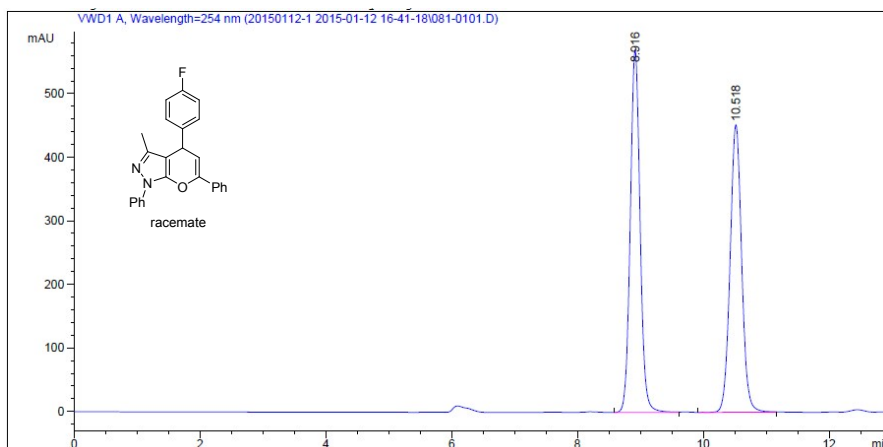

| Peak # | RetTime [min] | Type | Width [min] | Area mAU *s | Height [mAU] | Area %  |
|--------|---------------|------|-------------|-------------|--------------|---------|
| 1      | 8.916         | VB   | 0.1655      | 6168.44727  | 570.31036    | 51.6884 |
| 2      | 10.518        | VB   | 0.1967      | 5765.47217  | 452.34433    | 48.3116 |

Totals : 1.19339e4 1022.65469

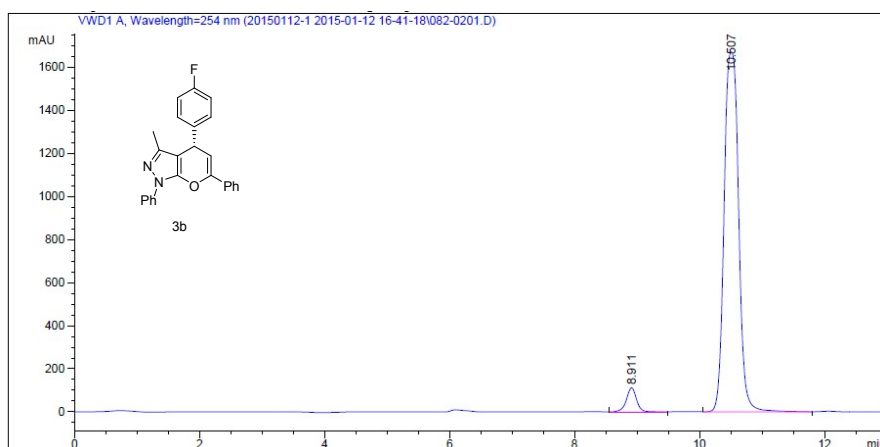

| Peak # | RetTime [min] | Type | Width [min] | Area mAU *s | Height [mAU] | Area %  |
|--------|---------------|------|-------------|-------------|--------------|---------|
| 1      | 8.911         | VB   | 0.1709      | 1262.13257  | 111.93694    | 4.4876  |
| 2      | 10.507        | VB   | 0.2559      | 2.68624e4   | 1672.10815   | 95.5124 |

Totals : 2.81246e4 1784.04510

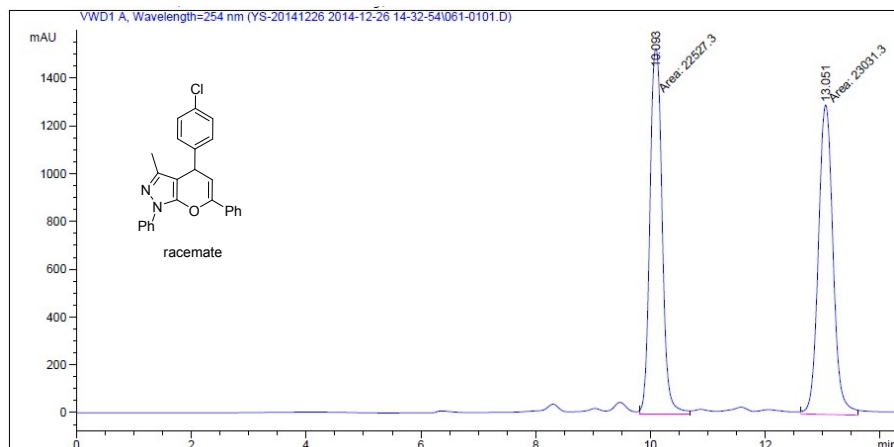

| Peak # | RetTime [min] | Type | Width [min] | Area [mAU*s] | Height [mAU] | Area %  |
|--------|---------------|------|-------------|--------------|--------------|---------|
| 1      | 10.093        | MM   | 0.2457      | 2.25273e4    | 1528.36890   | 49.4468 |
| 2      | 13.051        | MM   | 0.2962      | 2.30313e4    | 1295.90747   | 50.5532 |

Totals : 4.55587e4 2824.27637

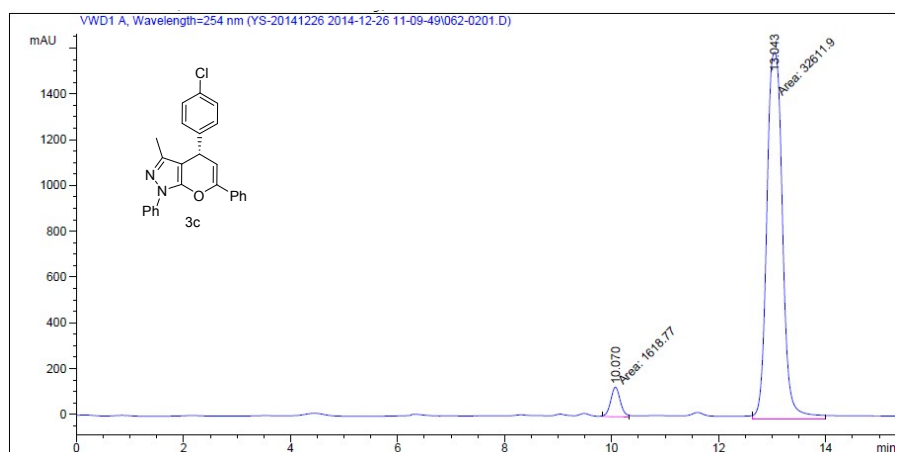

| Peak # | RetTime [min] | Type | Width [min] | Area [mAU*s] | Height [mAU] | Area %  |
|--------|---------------|------|-------------|--------------|--------------|---------|
| 1      | 10.070        | MM   | 0.2086      | 1618.76819   | 129.33830    | 4.7290  |
| 2      | 13.043        | MM   | 0.3393      | 3.26119e4    | 1602.07434   | 95.2710 |

Totals : 3.42306e4 1731.41264

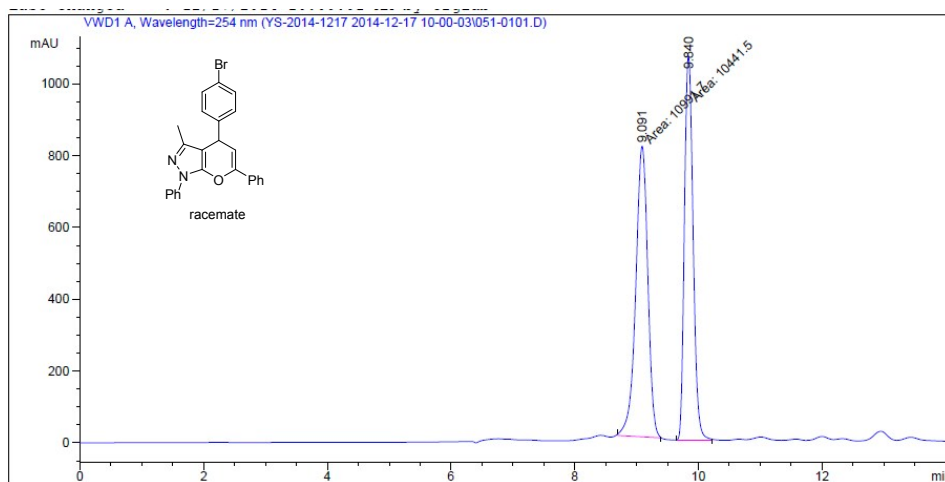

| Peak # | RetTime [min] | Type | Width [min] | Area mAU *s | Height [mAU] | Area %  |
|--------|---------------|------|-------------|-------------|--------------|---------|
| 1      | 9.091         | MM   | 0.2262      | 1.09917e4   | 809.77209    | 51.2836 |
| 2      | 9.840         | MM   | 0.1625      | 1.04415e4   | 1071.04590   | 48.7164 |

Totals : 2.14331e4 1880.81799

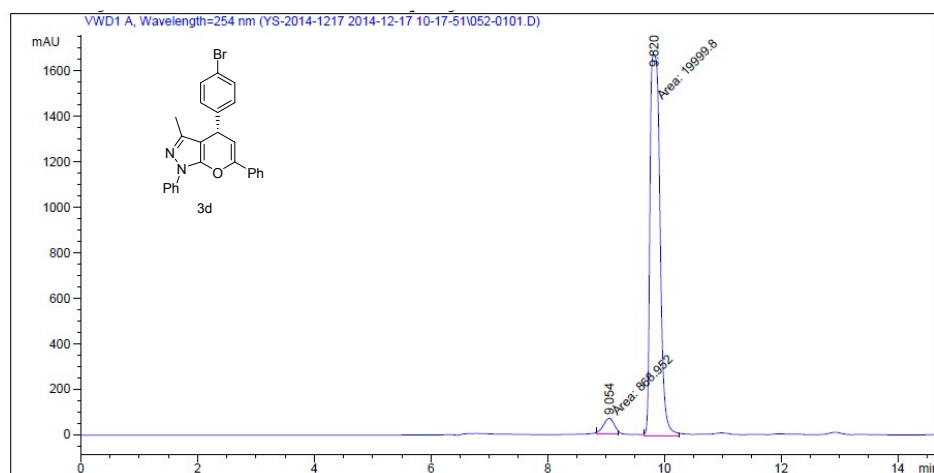

| Peak # | RetTime [min] | Type | Width [min] | Area mAU *s | Height [mAU] | Area %  |
|--------|---------------|------|-------------|-------------|--------------|---------|
| 1      | 9.054         | MM   | 0.2102      | 868.95221   | 68.91178     | 4.1639  |
| 2      | 9.820         | MM   | 0.1986      | 1.99998e4   | 1678.65979   | 95.8361 |

Totals : 2.08687e4 1747.57157

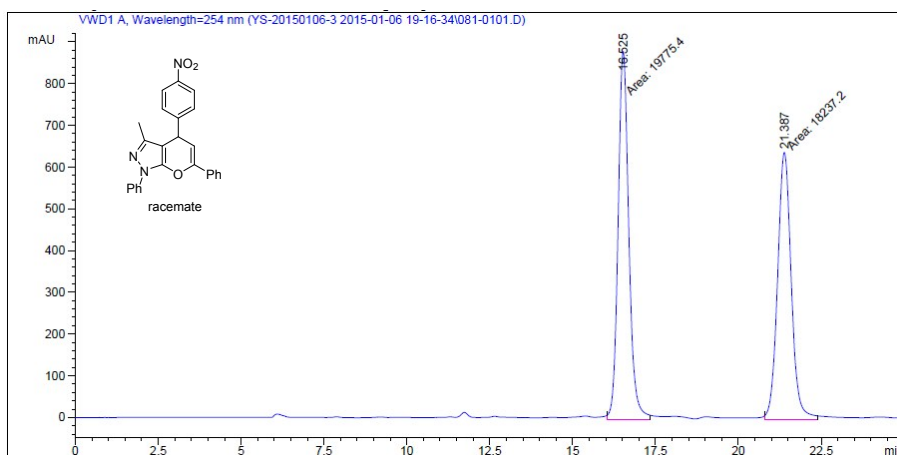

| Peak # | RetTime [min] | Type | Width [min] | Area mAU * s | Height [mAU] | Area %  |
|--------|---------------|------|-------------|--------------|--------------|---------|
| 1      | 16.525        | MM   | 0.3741      | 1.97754e4    | 881.03809    | 52.0233 |
| 2      | 21.387        | MM   | 0.4753      | 1.82372e4    | 639.48157    | 47.9767 |

Totals : 3.80125e4 1520.51965

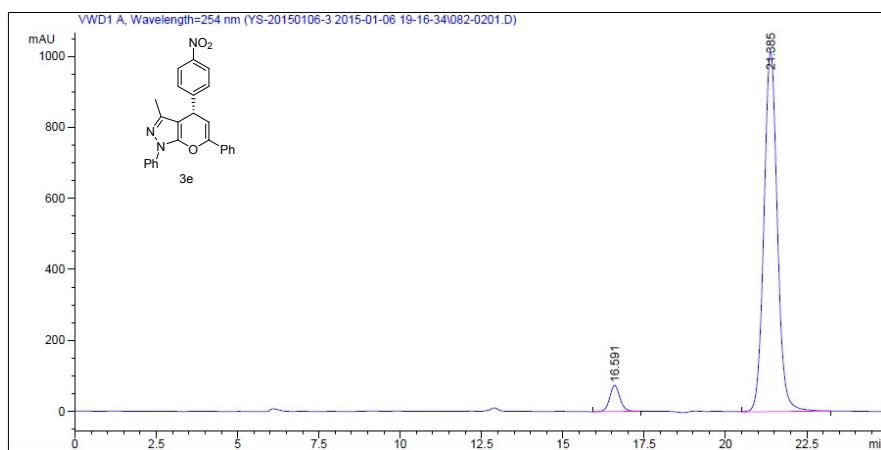

| Peak # | RetTime [min] | Type | Width [min] | Area mAU * s | Height [mAU] | Area %  |
|--------|---------------|------|-------------|--------------|--------------|---------|
| 1      | 16.591        | VB   | 0.3351      | 1620.85046   | 73.72836     | 5.2853  |
| 2      | 21.385        | VB   | 0.4428      | 2.90462e4    | 1015.95203   | 94.7147 |

Totals : 3.06670e4 1089.68038

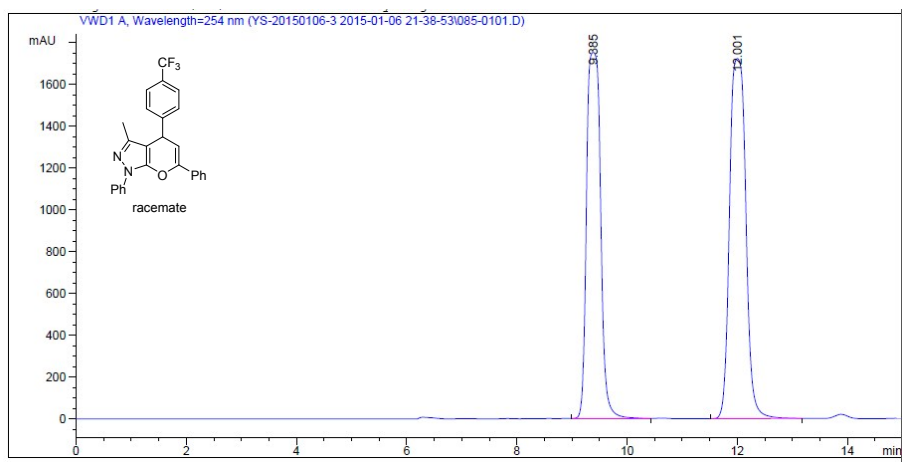

| Peak #   | RetTime [min] | Type | Width [min] | Area mAU *s | Height [mAU] | Area %  |
|----------|---------------|------|-------------|-------------|--------------|---------|
| 1        | 9.385         | VV   | 0.2820      | 3.09704e4   | 1751.63013   | 46.7996 |
| 2        | 12.001        | VB   | 0.3260      | 3.52062e4   | 1721.35059   | 53.2004 |
| Totals : |               |      |             | 6.61766e4   | 3472.98071   |         |

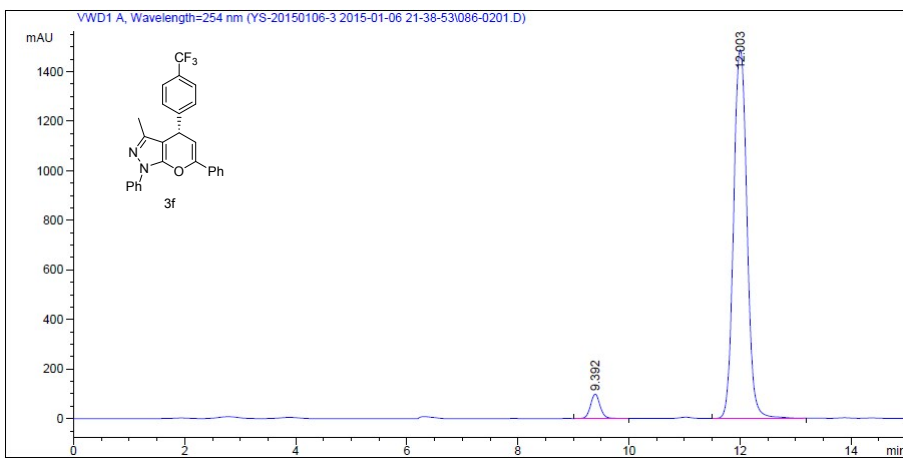

| Peak #   | RetTime [min] | Type | Width [min] | Area mAU *s | Height [mAU] | Area %  |
|----------|---------------|------|-------------|-------------|--------------|---------|
| 1        | 9.392         | VB   | 0.1857      | 1190.87305  | 98.87281     | 4.5685  |
| 2        | 12.003        | VB   | 0.2635      | 2.48760e4   | 1487.44263   | 95.4315 |
| Totals : |               |      |             | 2.60668e4   | 1586.31544   |         |

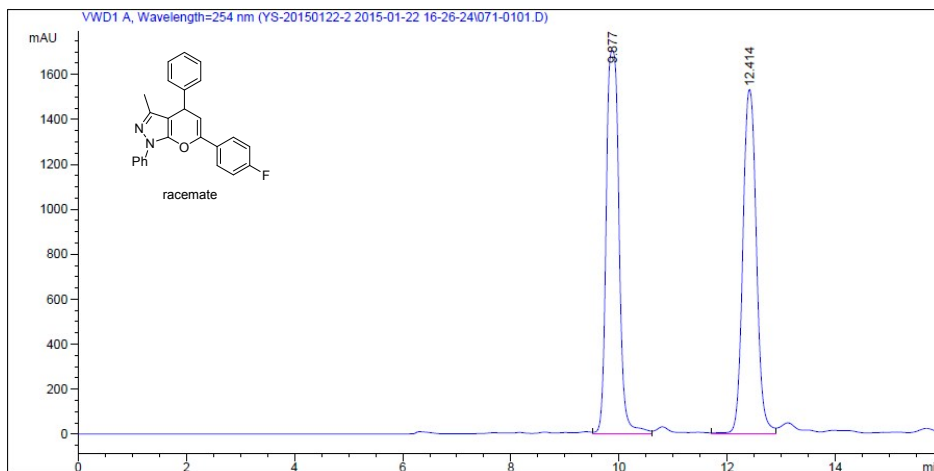

| Peak # | RetTime [min] | Type | Width [min] | Area mAU *s | Height [mAU] | Area %  |
|--------|---------------|------|-------------|-------------|--------------|---------|
| 1      | 9.877         | VV   | 0.2622      | 2.81501e4   | 1707.53662   | 51.2769 |
| 2      | 12.414        | VV   | 0.2749      | 2.67481e4   | 1533.27393   | 48.7231 |

Totals : 5.48981e4 3240.81055

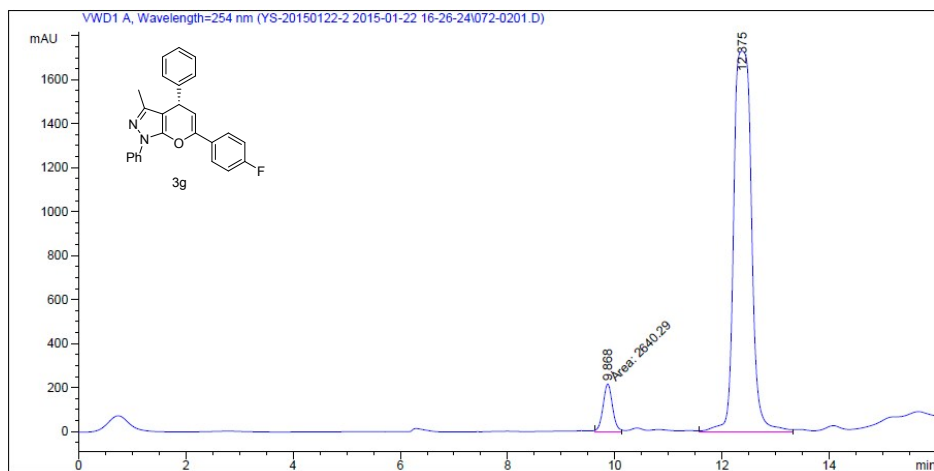

| Peak # | RetTime [min] | Type | Width [min] | Area mAU *s | Height [mAU] | Area %  |
|--------|---------------|------|-------------|-------------|--------------|---------|
| 1      | 9.868         | MM   | 0.2034      | 2640.29395  | 216.35187    | 6.1746  |
| 2      | 12.375        | VV   | 0.3662      | 4.01201e4   | 1733.08203   | 93.8254 |

Totals : 4.27604e4 1949.43390



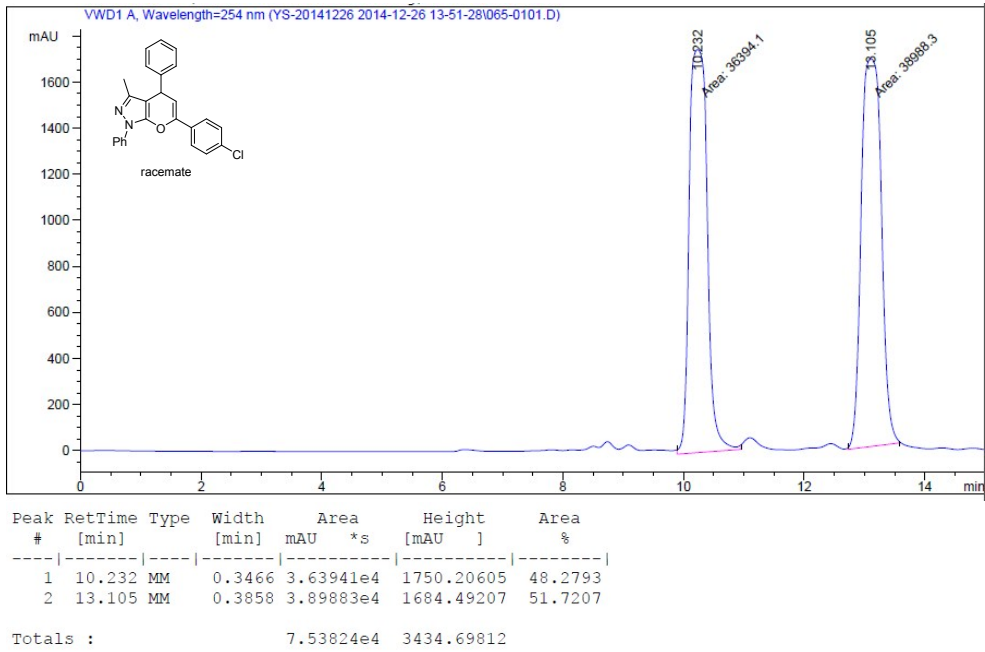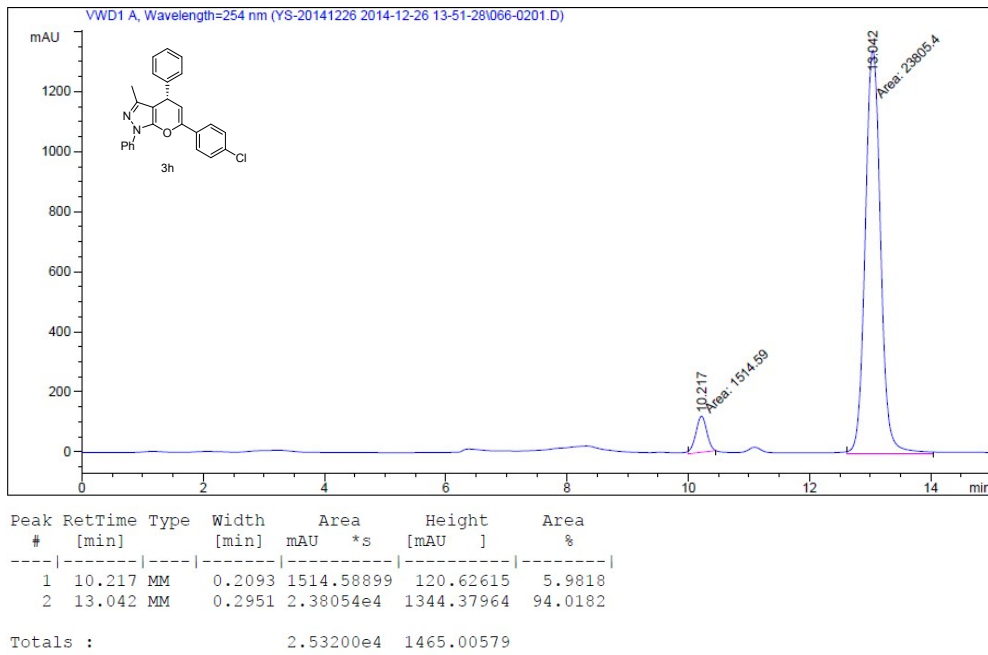

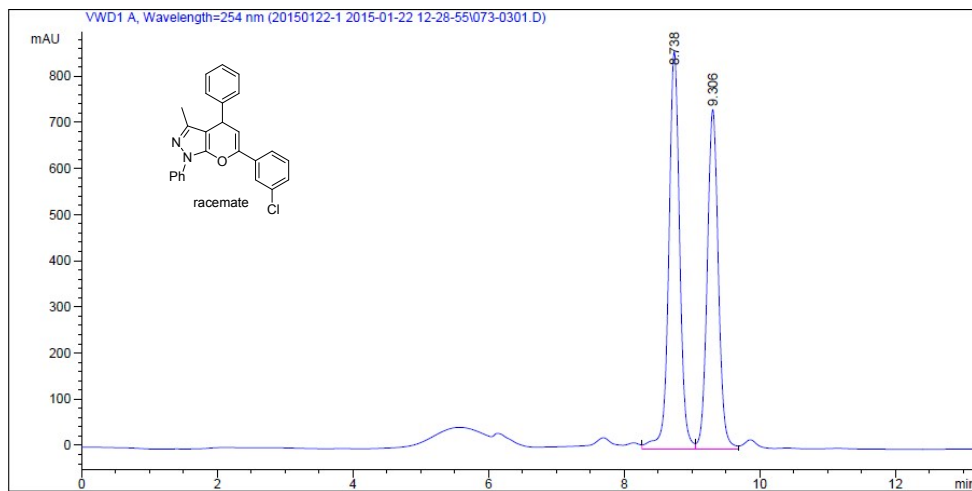

| Peak # | RetTime [min] | Type | Width [min] | Area mAU *s | Height [mAU] | Area %  |
|--------|---------------|------|-------------|-------------|--------------|---------|
| 1      | 8.738         | VV   | 0.1712      | 9631.56543  | 861.62970    | 53.4944 |
| 2      | 9.306         | VV   | 0.1749      | 8373.23242  | 736.26532    | 46.5056 |

Totals : 1.80048e4 1597.89502

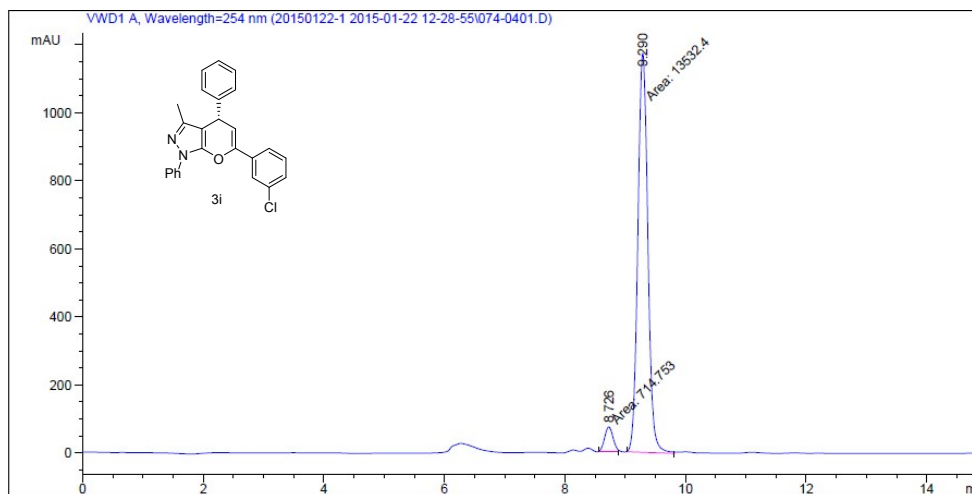

| Peak # | RetTime [min] | Type | Width [min] | Area mAU *s | Height [mAU] | Area %  |
|--------|---------------|------|-------------|-------------|--------------|---------|
| 1      | 8.726         | MM   | 0.1624      | 714.75281   | 73.33372     | 5.0168  |
| 2      | 9.290         | MM   | 0.1922      | 1.35324e4   | 1173.73926   | 94.9832 |

Totals : 1.42472e4 1247.07298

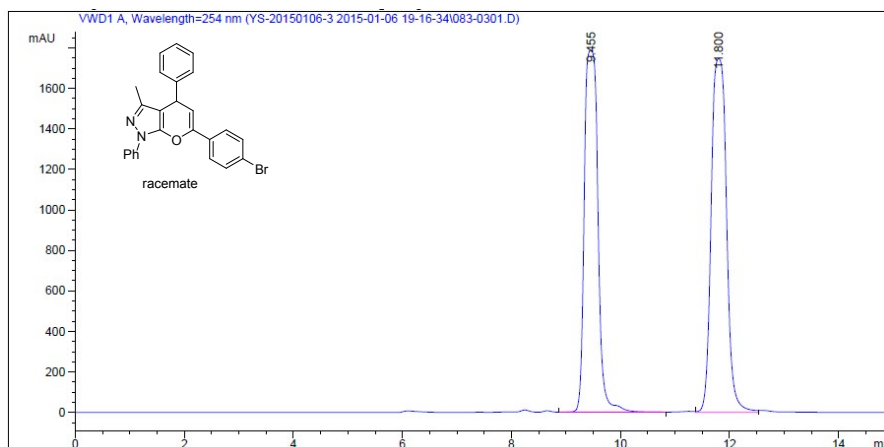

| Peak # | RetTime [min] | Type | Width [min] | Area mAU *s | Height [mAU] | Area %  |
|--------|---------------|------|-------------|-------------|--------------|---------|
| 1      | 9.455         | VV   | 0.2772      | 3.11306e4   | 1789.41003   | 47.7939 |
| 2      | 11.800        | VV   | 0.3086      | 3.40045e4   | 1747.02222   | 52.2061 |

Totals : 6.51350e4 3536.43225

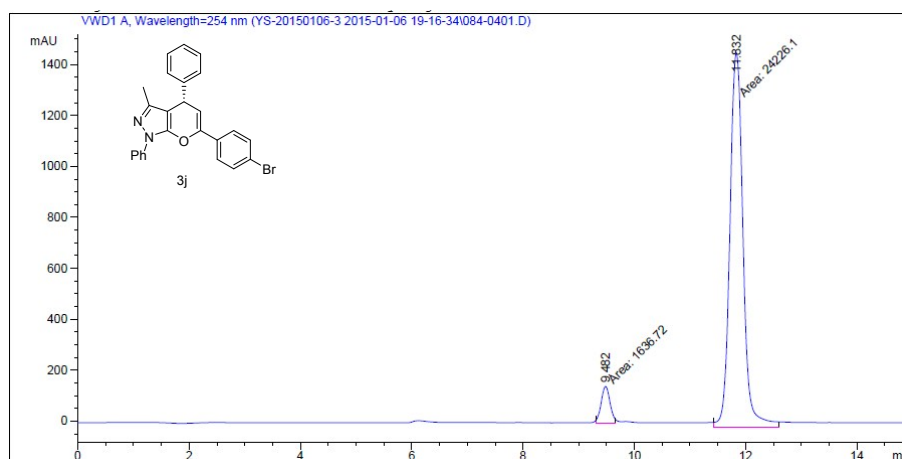

| Peak # | RetTime [min] | Type | Width [min] | Area mAU *s | Height [mAU] | Area %  |
|--------|---------------|------|-------------|-------------|--------------|---------|
| 1      | 9.482         | MM   | 0.1861      | 1636.71716  | 146.58005    | 6.3285  |
| 2      | 11.832        | MM   | 0.2746      | 2.42261e4   | 1470.41772   | 93.6715 |

Totals : 2.58628e4 1616.99777

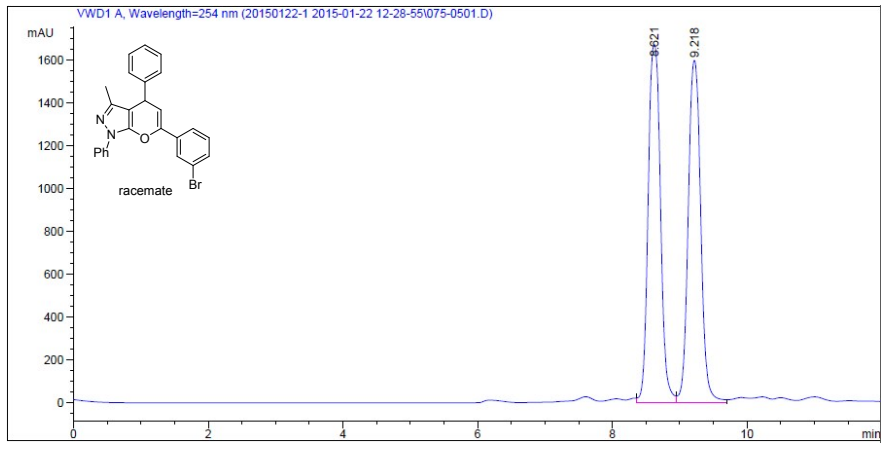

| Peak # | RetTime [min] | Type | Width [min] | Area mAU *s | Height [mAU] | Area %  |
|--------|---------------|------|-------------|-------------|--------------|---------|
| 1      | 8.621         | VV   | 0.2023      | 2.12947e4   | 1673.93591   | 50.7253 |
| 2      | 9.218         | VV   | 0.2033      | 2.06858e4   | 1599.87451   | 49.2747 |

Totals : 4.19805e4 3273.81042

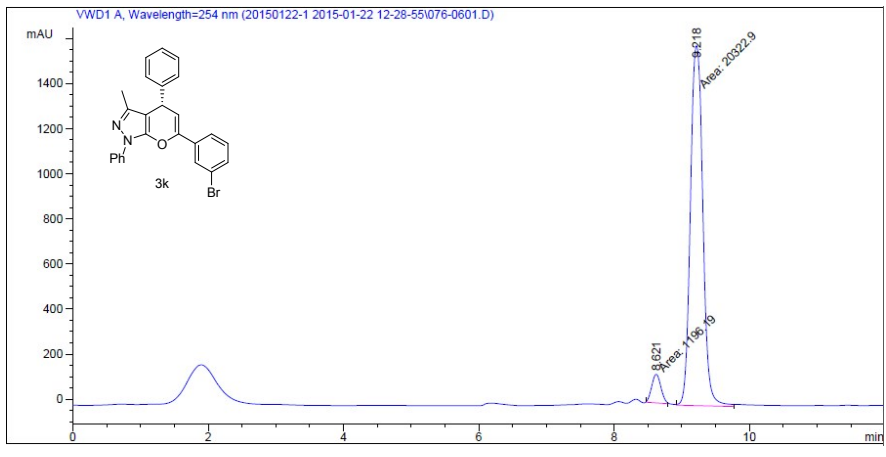

| Peak # | RetTime [min] | Type | Width [min] | Area mAU *s | Height [mAU] | Area %  |
|--------|---------------|------|-------------|-------------|--------------|---------|
| 1      | 8.621         | MM   | 0.1572      | 1196.18567  | 126.86227    | 5.5587  |
| 2      | 9.218         | MM   | 0.2122      | 2.03229e4   | 1595.91174   | 94.4413 |

Totals : 2.15191e4 1722.77401

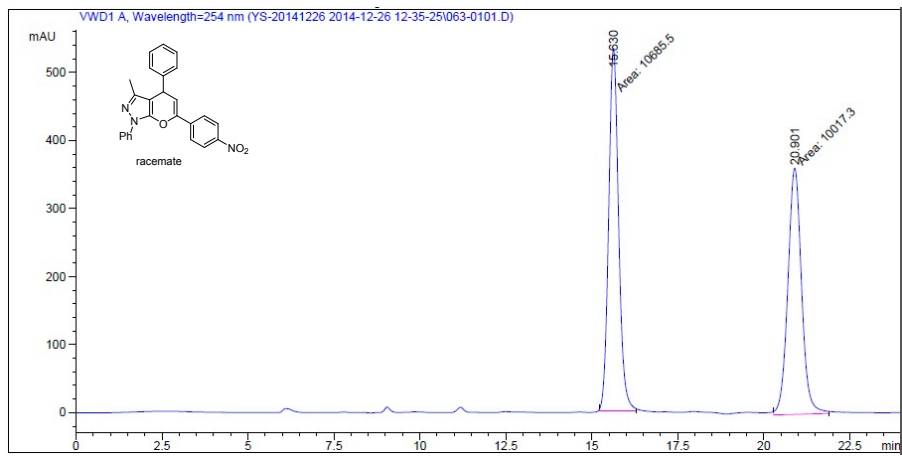

| Peak #   | RetTime [min] | Type | Width [min] | Area mAU *s | Height [mAU] | Area %  |
|----------|---------------|------|-------------|-------------|--------------|---------|
| 1        | 15.630        | MM   | 0.3344      | 1.06855e4   | 532.51013    | 51.6138 |
| 2        | 20.901        | MM   | 0.4614      | 1.00173e4   | 361.87399    | 48.3862 |
| Totals : |               |      |             | 2.07027e4   | 894.38412    |         |

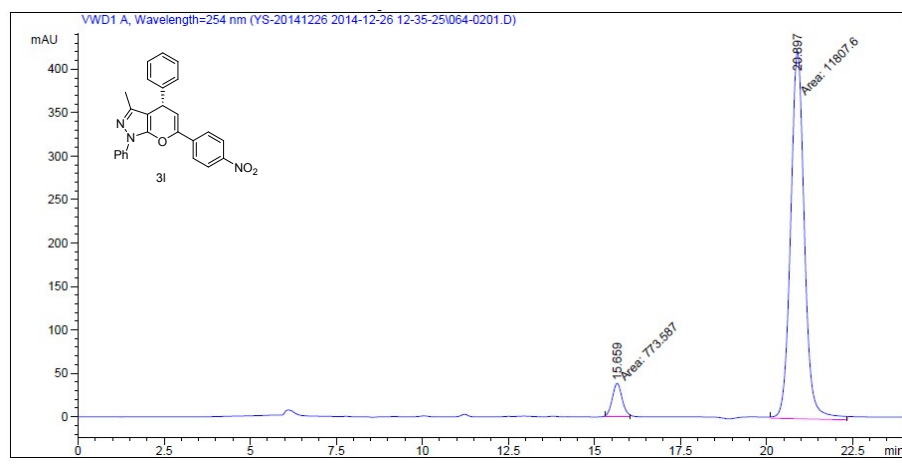

| Peak #   | RetTime [min] | Type | Width [min] | Area mAU *s | Height [mAU] | Area %  |
|----------|---------------|------|-------------|-------------|--------------|---------|
| 1        | 15.659        | MM   | 0.3347      | 773.58728   | 38.51691     | 6.1487  |
| 2        | 20.897        | MM   | 0.4656      | 1.18076e4   | 422.70999    | 93.8513 |
| Totals : |               |      |             | 1.25812e4   | 461.22690    |         |

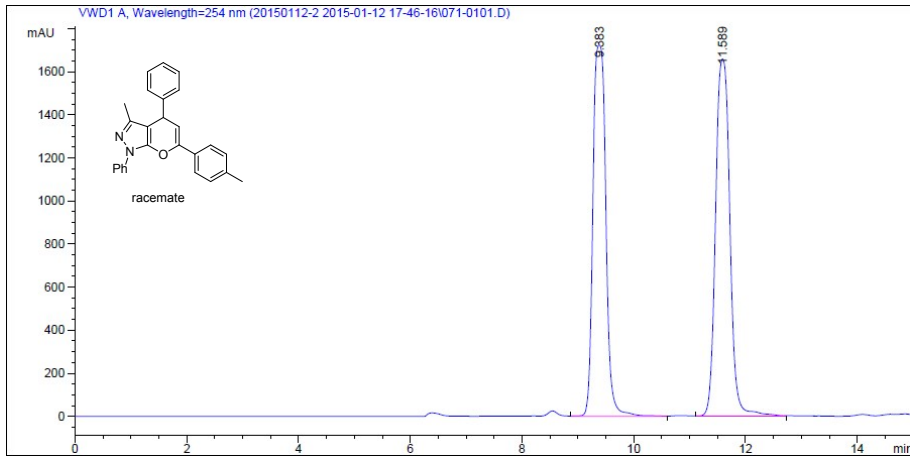

| Peak # | RetTime [min] | Type | Width [min] | Area mAU *s | Height [mAU] | Area %  |
|--------|---------------|------|-------------|-------------|--------------|---------|
| 1      | 9.383         | VB   | 0.2556      | 2.76536e4   | 1724.02222   | 48.3661 |
| 2      | 11.589        | VB   | 0.2819      | 2.95220e4   | 1658.77588   | 51.6339 |

Totals : 5.71756e4 3382.79810

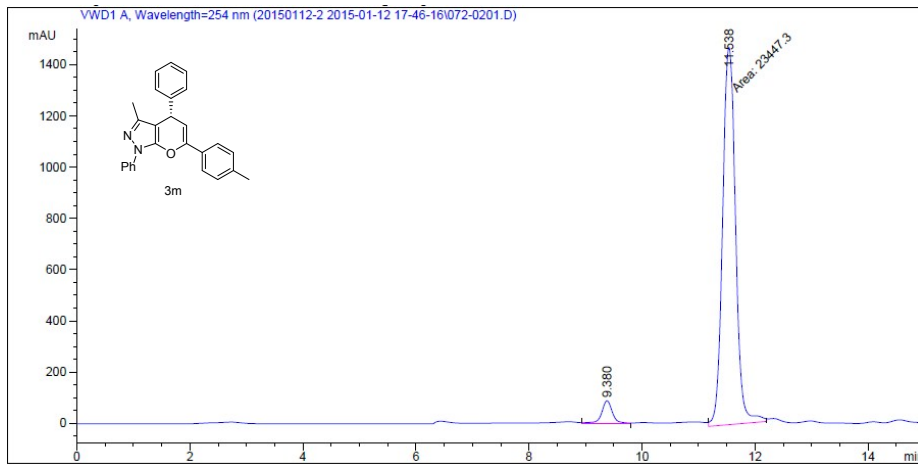

| Peak # | RetTime [min] | Type | Width [min] | Area mAU *s | Height [mAU] | Area %  |
|--------|---------------|------|-------------|-------------|--------------|---------|
| 1      | 9.380         | VV   | 0.2054      | 1249.38440  | 90.13348     | 5.0589  |
| 2      | 11.538        | MM   | 0.2656      | 2.34473e4   | 1471.58655   | 94.9411 |

Totals : 2.46967e4 1561.72003

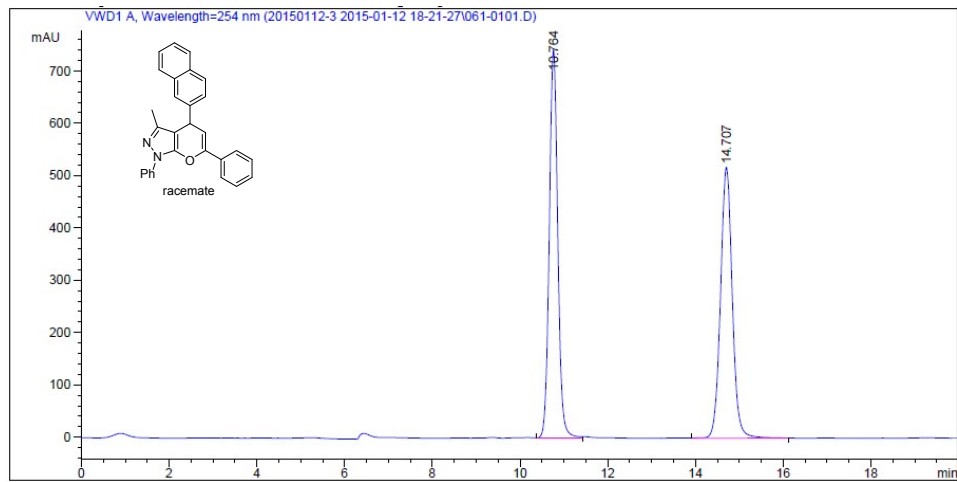

| Peak # | RetTime [min] | Type | Width [min] | Area mAU   | Area *s   | Height [mAU] | Area %  |
|--------|---------------|------|-------------|------------|-----------|--------------|---------|
| 1      | 10.764        | VV   | 0.2068      | 9999.89648 | 741.90961 | 50.8584      | 50.8584 |
| 2      | 14.707        | VB   | 0.2861      | 9662.35449 | 517.78040 | 49.1416      | 49.1416 |

Totals : 1.96623e4 1259.69000

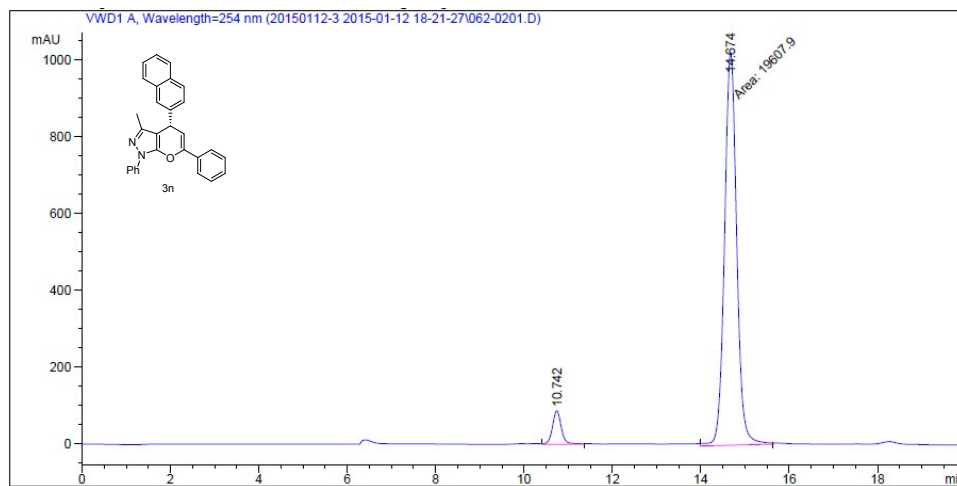

| Peak # | RetTime [min] | Type | Width [min] | Area mAU   | Area *s    | Height [mAU] | Area %  |
|--------|---------------|------|-------------|------------|------------|--------------|---------|
| 1      | 10.742        | VV   | 0.2124      | 1220.55969 | 87.44185   | 5.8601       | 5.8601  |
| 2      | 14.674        | MM   | 0.3195      | 1.96079e4  | 1022.88086 | 94.1399      | 94.1399 |

Totals : 2.08284e4 1110.32271

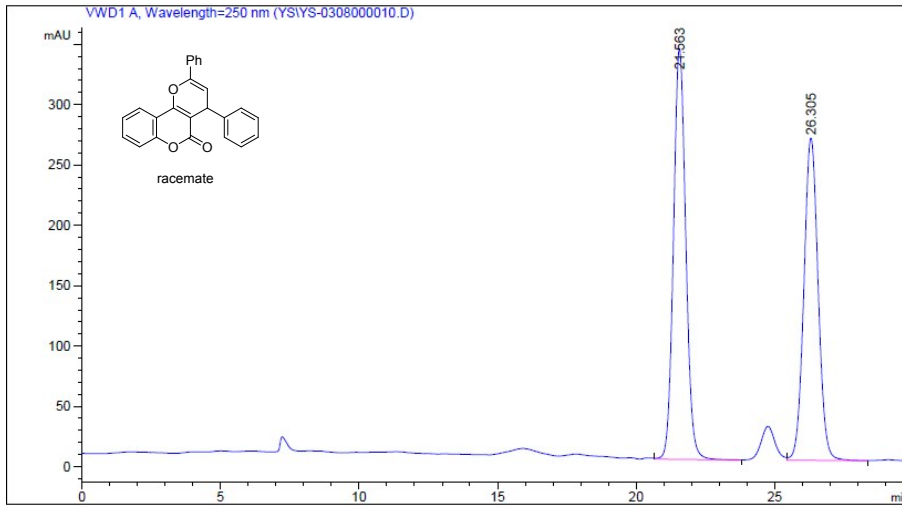

| Peak #   | RetTime [min] | Type | Width [min] | Area [mAU*s] | Height [mAU] | Area %  |
|----------|---------------|------|-------------|--------------|--------------|---------|
| 1        | 21.563        | VB   | 0.4891      | 1.05084e4    | 339.66769    | 52.4064 |
| 2        | 26.305        | VV   | 0.5688      | 9543.38086   | 266.73843    | 47.5936 |
| Totals : |               |      |             | 2.00518e4    | 606.40613    |         |

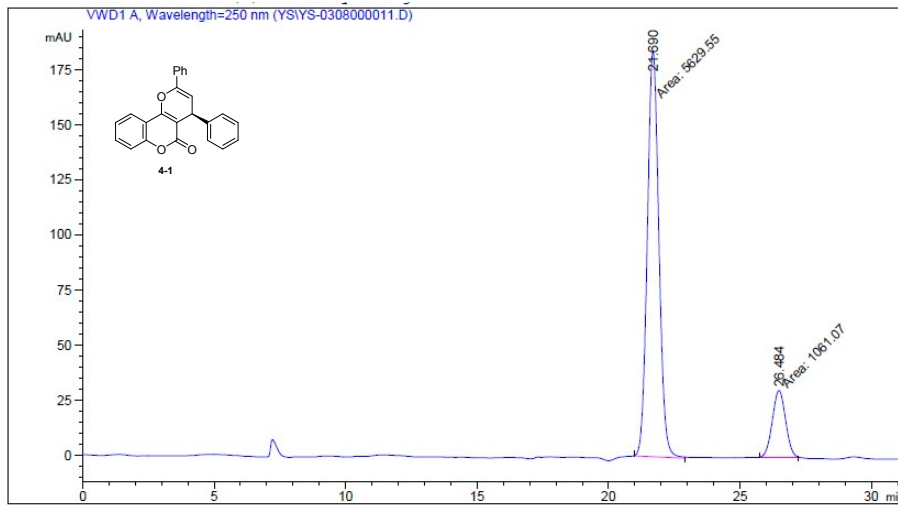

| Peak #   | RetTime [min] | Type | Width [min] | Area [mAU*s] | Height [mAU] | Area %  |
|----------|---------------|------|-------------|--------------|--------------|---------|
| 1        | 21.690        | MM   | 0.5086      | 5629.55420   | 184.46404    | 84.1409 |
| 2        | 26.484        | MM   | 0.5825      | 1061.07373   | 30.36044     | 15.8591 |
| Totals : |               |      |             | 6690.62793   | 214.82447    |         |



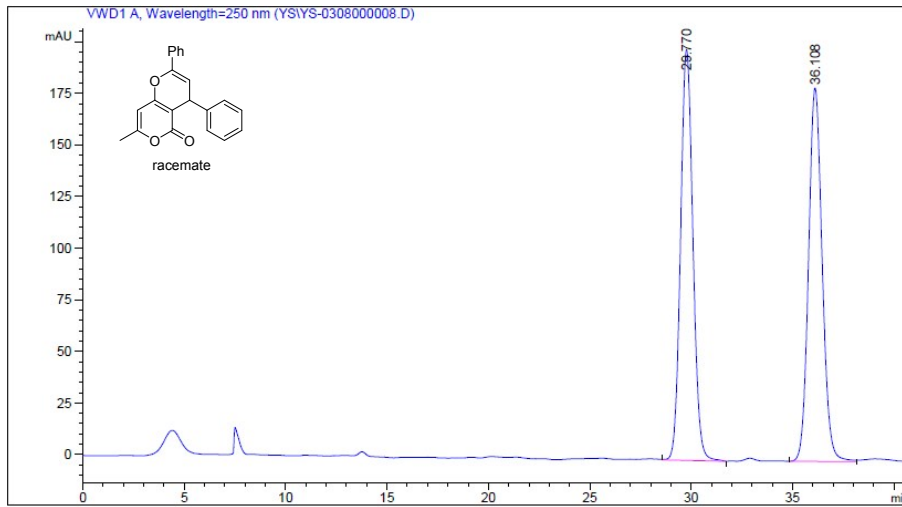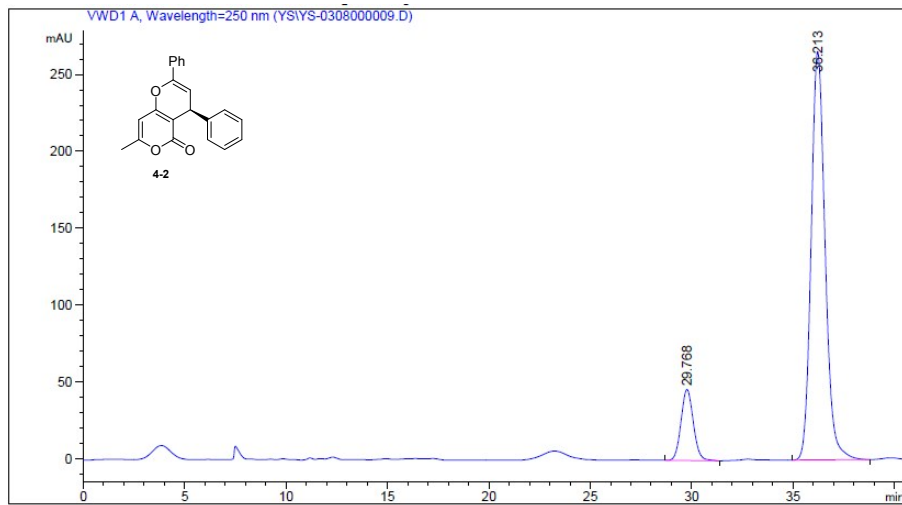

## 3C

**Table 1 Crystal data and structure refinement for 3C.**

|                                             |                                                               |
|---------------------------------------------|---------------------------------------------------------------|
| Identification code                         | 3C                                                            |
| Empirical formula                           | C <sub>25</sub> H <sub>19</sub> ClN <sub>2</sub> O            |
| Formula weight                              | 398.87                                                        |
| Temperature/K                               | 303.9                                                         |
| Crystal system                              | monoclinic                                                    |
| Space group                                 | C2                                                            |
| a/Å                                         | 21.832(2)                                                     |
| b/Å                                         | 5.1765(5)                                                     |
| c/Å                                         | 18.5849(19)                                                   |
| α/°                                         | 90                                                            |
| β/°                                         | 103.747(2)                                                    |
| γ/°                                         | 90                                                            |
| Volume/Å <sup>3</sup>                       | 2040.2(4)                                                     |
| Z                                           | 4                                                             |
| ρ <sub>calc</sub> /g/cm <sup>3</sup>        | 1.299                                                         |
| μ/mm <sup>-1</sup>                          | 0.206                                                         |
| F(000)                                      | 832.0                                                         |
| Crystal size/mm <sup>3</sup>                | 0.1 × 0.06 × 0.04                                             |
| Radiation                                   | MoKα (λ = 0.71073)                                            |
| 2θ range for data collection/°              | 4.512 to 52.036                                               |
| Index ranges                                | -26 ≤ h ≤ 26, -6 ≤ k ≤ 5, -22 ≤ l ≤ 22                        |
| Reflections collected                       | 18832                                                         |
| Independent reflections                     | 3766 [R <sub>int</sub> = 0.0707, R <sub>sigma</sub> = 0.0606] |
| Data/restraints/parameters                  | 3766/73/300                                                   |
| Goodness-of-fit on F <sup>2</sup>           | 1.064                                                         |
| Final R indexes [I ≥ 2σ(I)]                 | R <sub>1</sub> = 0.0650, wR <sub>2</sub> = 0.1376             |
| Final R indexes [all data]                  | R <sub>1</sub> = 0.1098, wR <sub>2</sub> = 0.1556             |
| Largest diff. peak/hole / e Å <sup>-3</sup> | 0.18/-0.20                                                    |
| Flack parameter                             | 0.14(5)                                                       |

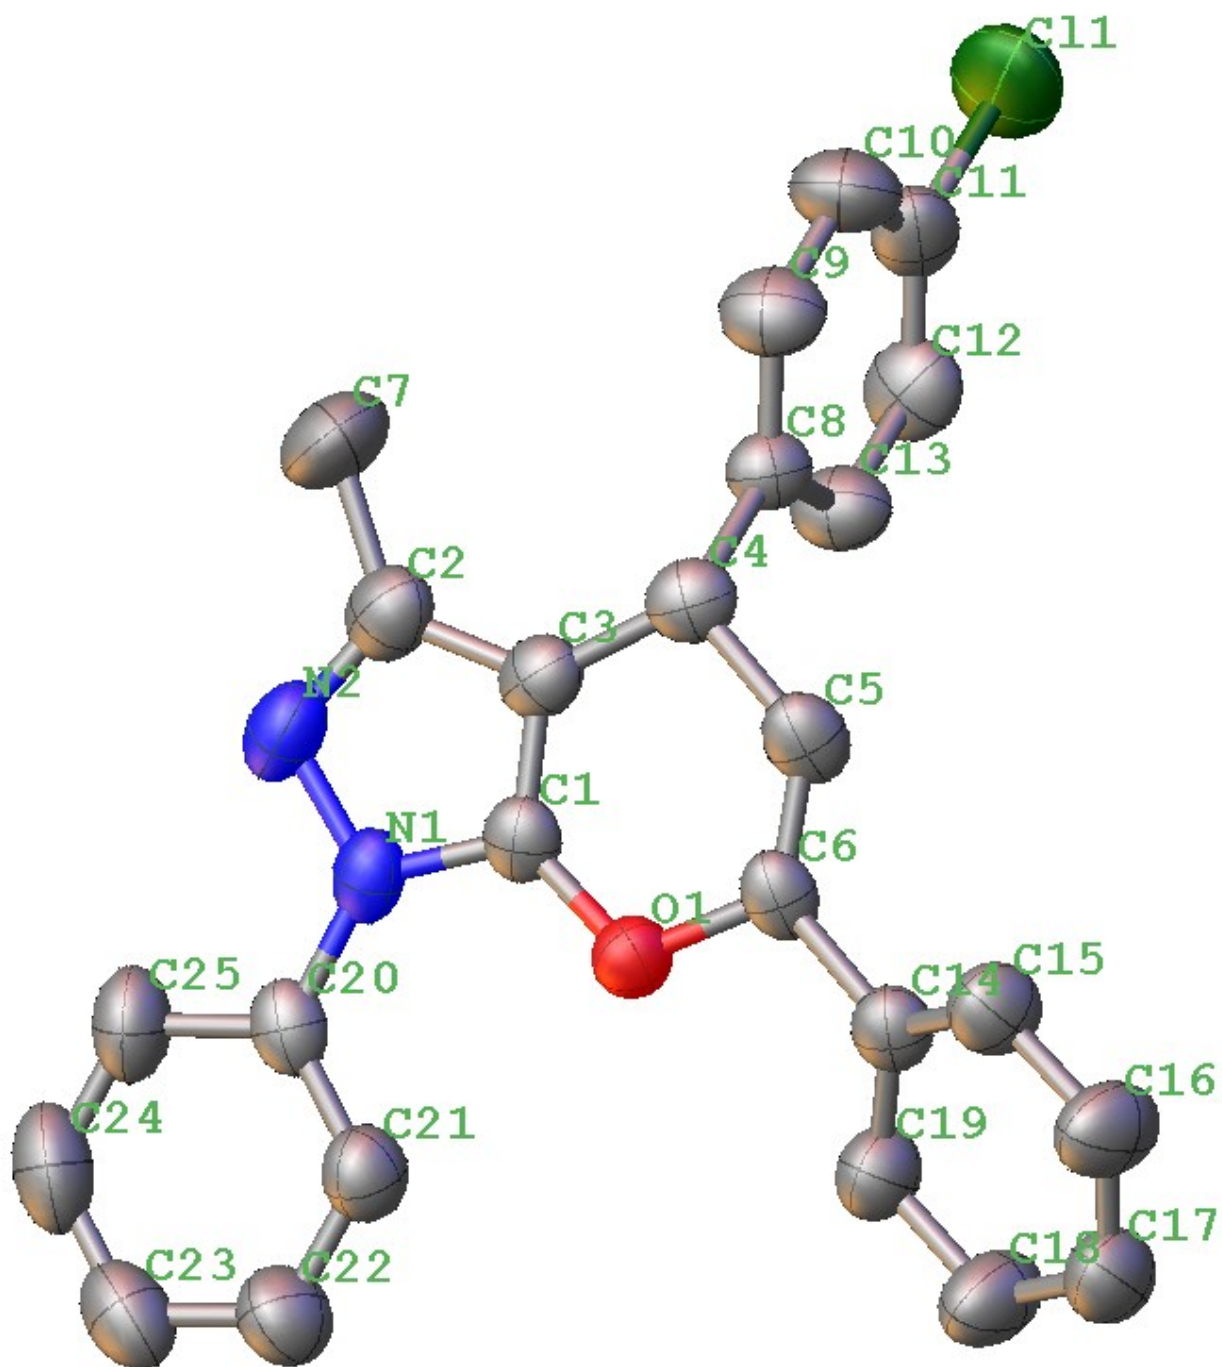

Table 2 Fractional Atomic Coordinates ( $\times 10^4$ ) and Equivalent Isotropic Displacement Parameters ( $\text{\AA}^2 \times 10^3$ ) for 3C.  $U_{\text{eq}}$  is defined as 1/3 of of the trace of the orthogonalised  $U_{ij}$  tensor.

| Atom | <i>x</i>    | <i>y</i>   | <i>z</i>    | $U_{\text{eq}}$ |
|------|-------------|------------|-------------|-----------------|
| Cl1  | 3533.0 (9)  | 9493 (6)   | 6560.2 (8)  | 111.3 (9)       |
| O1   | 2766.2 (15) | 6258 (8)   | 2019.9 (17) | 51.7 (10)       |
| N1   | 3773.9 (17) | 4284 (11)  | 2207 (2)    | 51.5 (13)       |
| N2   | 4359.8 (19) | 4553 (14)  | 2689 (2)    | 66.6 (15)       |
| C1   | 3376 (2)    | 6034 (12)  | 2401 (2)    | 45.6 (14)       |
| C2   | 4298 (3)    | 6438 (15)  | 3149 (3)    | 64.7 (18)       |
| C3   | 3681 (2)    | 7416 (13)  | 2989 (3)    | 50.7 (15)       |
| C4   | 3382 (2)    | 9628 (13)  | 3286 (2)    | 50.4 (13)       |
| C5   | 2714 (2)    | 9741 (14)  | 2839 (2)    | 54.4 (14)       |
| C6   | 2444 (2)    | 8276 (11)  | 2277 (2)    | 47.1 (14)       |
| C7   | 4858 (3)    | 7290 (20)  | 3727 (4)    | 99 (3)          |
| C8   | 3424 (2)    | 9553 (12)  | 4113 (2)    | 46.0 (13)       |
| C9   | 3770 (3)    | 11313 (14) | 4577 (3)    | 66.0 (17)       |
| C10  | 3809 (3)    | 11317 (16) | 5332 (3)    | 76.1 (19)       |
| C11  | 3491 (3)    | 9505 (17)  | 5615 (3)    | 66.0 (18)       |
| C12  | 3140 (3)    | 7657 (15)  | 5174 (3)    | 67.4 (18)       |
| C13  | 3105 (3)    | 7708 (14)  | 4422 (3)    | 60.9 (16)       |
| C14  | 1792 (2)    | 8410 (12)  | 1841 (3)    | 50.3 (13)       |
| C17  | 559 (3)     | 8821 (15)  | 1024 (3)    | 75.6 (18)       |
| C20  | 3684 (2)    | 2386 (12)  | 1635 (3)    | 49.2 (14)       |
| C21  | 3118 (3)    | 2089 (14)  | 1134 (3)    | 61.9 (17)       |
| C22  | 3050 (3)    | 221 (15)   | 601 (4)     | 74 (2)          |
| C23  | 3542 (3)    | -1362 (15) | 554 (4)     | 77 (2)          |
| C24  | 4106 (3)    | -1065 (16) | 1060 (4)    | 85 (2)          |
| C25  | 4182 (3)    | 787 (16)   | 1600 (4)    | 74 (2)          |
| C15  | 1522 (6)    | 10790 (30) | 1725 (7)    | 65 (3)          |
| C16  | 899 (7)     | 11010 (40) | 1335 (9)    | 80 (4)          |
| C18  | 876 (7)     | 6420 (40)  | 1093 (10)   | 84 (5)          |
| C19  | 1507 (6)    | 6190 (40)  | 1505 (8)    | 64 (3)          |
| C26  | 1292 (4)    | 9290 (30)  | 2169 (5)    | 62 (3)          |
| C27  | 677 (5)     | 9420 (30)  | 1762 (6)    | 70 (4)          |
| C28  | 990 (5)     | 7980 (30)  | 712 (6)     | 66 (4)          |
| C29  | 1604 (5)    | 7800 (30)  | 1118 (5)    | 62 (3)          |

Table 3 Anisotropic Displacement Parameters ( $\text{\AA}^2 \times 10^3$ ) for 3C. The Anisotropic displacement factor exponent takes the form:  $-2\pi^2[h^2a^{*2}U_{11}+2hka^*b^*U_{12}+\dots]$ .

| Atom | $U_{11}$   | $U_{22}$ | $U_{33}$  | $U_{23}$ | $U_{13}$  | $U_{12}$  |
|------|------------|----------|-----------|----------|-----------|-----------|
| C11  | 103.0 (13) | 185 (3)  | 48.0 (7)  | 0.7 (12) | 21.6 (8)  | 14.0 (16) |
| O1   | 48.2 (19)  | 59 (3)   | 46.4 (17) | 1.1 (17) | 7.4 (15)  | 6.9 (19)  |
| N1   | 44 (2)     | 65 (4)   | 48 (2)    | 15 (2)   | 17.9 (18) | 10 (2)    |
| N2   | 44 (2)     | 92 (5)   | 64 (3)    | 13 (3)   | 13 (2)    | 5 (3)     |
| C1   | 50 (3)     | 52 (4)   | 37 (2)    | 13 (2)   | 15 (2)    | 5 (3)     |
| C2   | 54 (3)     | 87 (6)   | 55 (3)    | 8 (3)    | 16 (3)    | -1 (3)    |
| C3   | 48 (3)     | 61 (5)   | 44 (3)    | 8 (3)    | 13 (2)    | -6 (3)    |
| C4   | 57 (3)     | 49 (4)   | 45 (2)    | 11 (3)   | 10 (2)    | -4 (3)    |
| C5   | 68 (3)     | 55 (4)   | 40 (2)    | 12 (3)   | 13 (2)    | 15 (3)    |
| C6   | 59 (3)     | 47 (4)   | 37 (2)    | 12 (2)   | 16 (2)    | 14 (3)    |
| C7   | 56 (4)     | 138 (9)  | 92 (5)    | -15 (5)  | -5 (3)    | 0 (5)     |
| C8   | 50 (3)     | 40 (4)   | 45 (2)    | 6 (3)    | 6 (2)     | 0 (3)     |
| C9   | 75 (4)     | 59 (5)   | 62 (3)    | 3 (3)    | 14 (3)    | -15 (4)   |
| C10  | 83 (4)     | 82 (6)   | 58 (3)    | -12 (4)  | 4 (3)     | -9 (4)    |
| C11  | 59 (3)     | 91 (6)   | 44 (3)    | 6 (4)    | 5 (2)     | 18 (4)    |
| C12  | 71 (4)     | 79 (5)   | 56 (3)    | 19 (3)   | 22 (3)    | -5 (4)    |
| C13  | 67 (3)     | 61 (5)   | 53 (3)    | 2 (3)    | 11 (3)    | -13 (3)   |
| C14  | 54 (2)     | 56 (4)   | 41 (2)    | 8 (2)    | 11.4 (18) | 8 (2)     |
| C17  | 61 (3)     | 88 (5)   | 72 (3)    | -7 (3)   | 5 (2)     | 17 (3)    |
| C20  | 59 (3)     | 43 (4)   | 52 (3)    | 13 (3)   | 26 (2)    | 6 (3)     |
| C21  | 61 (4)     | 62 (5)   | 63 (3)    | 4 (3)    | 16 (3)    | 11 (3)    |
| C22  | 78 (4)     | 66 (6)   | 78 (4)    | -8 (4)   | 18 (3)    | 9 (4)     |
| C23  | 93 (5)     | 69 (6)   | 79 (4)    | -8 (4)   | 41 (4)    | 2 (4)     |
| C24  | 85 (5)     | 79 (7)   | 106 (5)   | 7 (5)    | 52 (4)    | 23 (4)    |
| C25  | 63 (4)     | 79 (6)   | 87 (4)    | 10 (4)   | 31 (3)    | 20 (4)    |
| C15  | 65 (5)     | 67 (6)   | 59 (7)    | 4 (4)    | 5 (4)     | 14 (4)    |
| C16  | 68 (5)     | 77 (6)   | 84 (9)    | -3 (5)   | -7 (5)    | 18 (4)    |
| C18  | 61 (5)     | 79 (6)   | 100 (10)  | -11 (6)  | -5 (5)    | 10 (4)    |
| C19  | 53 (5)     | 67 (6)   | 68 (7)    | 0 (4)    | 10 (4)    | 9 (4)     |
| C26  | 57 (4)     | 75 (9)   | 54 (4)    | -7 (4)   | 16 (3)    | 7 (4)     |
| C27  | 55 (4)     | 91 (10)  | 64 (4)    | -9 (5)   | 12 (3)    | 14 (4)    |
| C28  | 59 (4)     | 82 (10)  | 50 (4)    | -4 (4)   | 1 (3)     | 19 (4)    |
| C29  | 57 (4)     | 83 (10)  | 44 (4)    | -2 (5)   | 8 (3)     | 21 (4)    |

Table 4 Bond Lengths for 3C.

| Atom | Atom | Length/Å   | Atom | Atom | Length/Å   |
|------|------|------------|------|------|------------|
| Cl1  | C11  | 1.737 (5)  | C12  | C13  | 1.383 (7)  |
| O1   | C1   | 1.356 (5)  | C14  | C15  | 1.361 (16) |
| O1   | C6   | 1.405 (6)  | C14  | C19  | 1.384 (18) |
| N1   | N2   | 1.383 (6)  | C14  | C26  | 1.445 (11) |
| N1   | C1   | 1.362 (7)  | C14  | C29  | 1.346 (10) |
| N1   | C20  | 1.426 (8)  | C17  | C16  | 1.403 (19) |
| N2   | C2   | 1.325 (9)  | C17  | C18  | 1.42 (2)   |
| C1   | C3   | 1.342 (7)  | C17  | C27  | 1.370 (12) |
| C2   | C3   | 1.403 (8)  | C17  | C28  | 1.293 (12) |
| C2   | C7   | 1.488 (8)  | C20  | C21  | 1.369 (7)  |
| C3   | C4   | 1.489 (9)  | C20  | C25  | 1.379 (8)  |
| C4   | C5   | 1.500 (7)  | C21  | C22  | 1.367 (9)  |
| C4   | C8   | 1.518 (6)  | C22  | C23  | 1.369 (9)  |
| C5   | C6   | 1.312 (8)  | C23  | C24  | 1.370 (9)  |
| C6   | C14  | 1.461 (7)  | C24  | C25  | 1.370 (10) |
| C8   | C9   | 1.355 (8)  | C15  | C16  | 1.385 (18) |
| C8   | C13  | 1.384 (8)  | C18  | C19  | 1.415 (18) |
| C9   | C10  | 1.385 (8)  | C26  | C27  | 1.377 (13) |
| C10  | C11  | 1.347 (10) | C28  | C29  | 1.378 (14) |
| C11  | C12  | 1.369 (10) |      |      |            |

Table 5 Bond Angles for 3C.

| Ato<br>m | Ato<br>m | Ato<br>m | Angle/°   | Ato<br>m | Ato<br>m | Ato<br>m | Angle/°    |
|----------|----------|----------|-----------|----------|----------|----------|------------|
| C1       | O1       | C6       | 113.3 (4) | C12      | C11      | Cl1      | 119.4 (6)  |
| N2       | N1       | C20      | 119.6 (4) | C11      | C12      | C13      | 118.7 (6)  |
| C1       | N1       | N2       | 108.1 (5) | C12      | C13      | C8       | 121.3 (6)  |
| C1       | N1       | C20      | 132.3 (4) | C15      | C14      | C6       | 117.4 (7)  |
| C2       | N2       | N1       | 105.8 (5) | C15      | C14      | C19      | 123.3 (9)  |
| O1       | C1       | N1       | 121.8 (5) | C19      | C14      | C6       | 118.9 (7)  |
| C3       | C1       | O1       | 128.0 (5) | C26      | C14      | C6       | 121.0 (5)  |
| C3       | C1       | N1       | 110.2 (4) | C29      | C14      | C6       | 124.6 (6)  |
| N2       | C2       | C3       | 111.6 (5) | C29      | C14      | C26      | 114.4 (7)  |
| N2       | C2       | C7       | 119.5 (6) | C16      | C17      | C18      | 118.2 (10) |
| C3       | C2       | C7       | 128.9 (7) | C28      | C17      | C27      | 122.8 (8)  |
| C1       | C3       | C2       | 104.3 (5) | C21      | C20      | N1       | 121.7 (5)  |
| C1       | C3       | C4       | 122.3 (5) | C21      | C20      | C25      | 119.6 (6)  |

|     |     |     |           |     |     |     |            |
|-----|-----|-----|-----------|-----|-----|-----|------------|
| C2  | C3  | C4  | 133.0 (5) | C25 | C20 | N1  | 118.6 (5)  |
| C3  | C4  | C5  | 106.2 (5) | C22 | C21 | C20 | 119.8 (6)  |
| C3  | C4  | C8  | 115.5 (5) | C21 | C22 | C23 | 121.2 (6)  |
| C5  | C4  | C8  | 112.3 (4) | C22 | C23 | C24 | 118.7 (7)  |
| C6  | C5  | C4  | 127.8 (6) | C25 | C24 | C23 | 120.9 (6)  |
| O1  | C6  | C14 | 110.3 (4) | C24 | C25 | C20 | 119.7 (6)  |
| C5  | C6  | O1  | 122.2 (5) | C14 | C15 | C16 | 119.5 (14) |
| C5  | C6  | C14 | 127.4 (5) | C15 | C16 | C17 | 120.5 (15) |
| C9  | C8  | C4  | 121.2 (5) | C19 | C18 | C17 | 121.1 (15) |
| C9  | C8  | C13 | 117.4 (5) | C14 | C19 | C18 | 116.7 (14) |
| C13 | C8  | C4  | 121.5 (5) | C27 | C26 | C14 | 121.3 (8)  |
| C8  | C9  | C10 | 122.4 (6) | C17 | C27 | C26 | 117.8 (9)  |
| C11 | C10 | C9  | 118.8 (6) | C17 | C28 | C29 | 119.7 (9)  |
| C10 | C11 | C11 | 119.3 (6) | C14 | C29 | C28 | 123.9 (9)  |
| C10 | C11 | C12 | 121.4 (5) |     |     |     |            |

**Table 6 Torsion Angles for 3C.**

| A   | B   | C   | D   | Angle/°    | A   | B   | C   | D   | Angle/°     |
|-----|-----|-----|-----|------------|-----|-----|-----|-----|-------------|
| C11 | C11 | C12 | C13 | 179.3 (5)  | C5  | C6  | C14 | C26 | -30.0 (11)  |
| O1  | C1  | C3  | C2  | -178.5 (5) | C5  | C6  | C14 | C29 | 148.8 (9)   |
| O1  | C1  | C3  | C4  | -4.3 (9)   | C6  | O1  | C1  | N1  | -176.2 (5)  |
| O1  | C6  | C14 | C15 | -146.4 (8) | C6  | O1  | C1  | C3  | 2.6 (7)     |
| O1  | C6  | C14 | C19 | 27.0 (9)   | C6  | C14 | C15 | C16 | -178.0 (11) |
| O1  | C6  | C14 | C26 | 149.0 (8)  | C6  | C14 | C19 | C18 | 179.7 (11)  |
| O1  | C6  | C14 | C29 | -32.2 (10) | C6  | C14 | C26 | C27 | -179.8 (11) |
| N1  | N2  | C2  | C3  | 0.6 (7)    | C6  | C14 | C29 | C28 | -178.6 (11) |
| N1  | N2  | C2  | C7  | -177.7 (6) | C7  | C2  | C3  | C1  | 177.4 (7)   |
| N1  | C1  | C3  | C2  | 0.4 (6)    | C7  | C2  | C3  | C4  | 4.1 (11)    |
| N1  | C1  | C3  | C4  | 174.7 (5)  | C8  | C4  | C5  | C6  | -129.6 (6)  |
| N1  | C20 | C21 | C22 | -179.1 (6) | C8  | C9  | C10 | C11 | -0.1 (10)   |
| N1  | C20 | C25 | C24 | 179.5 (6)  | C9  | C8  | C13 | C12 | -0.2 (9)    |
| N2  | N1  | C1  | O1  | 179.0 (4)  | C9  | C10 | C11 | C11 | -179.8 (5)  |
| N2  | N1  | C1  | C3  | 0.0 (6)    | C9  | C10 | C11 | C12 | 0.9 (11)    |
| N2  | N1  | C20 | C21 | -178.4 (5) | C10 | C11 | C12 | C13 | -1.4 (10)   |
| N2  | N1  | C20 | C25 | 2.8 (8)    | C11 | C12 | C13 | C8  | 1.0 (9)     |
| N2  | C2  | C3  | C1  | -0.6 (7)   | C13 | C8  | C9  | C10 | -0.3 (9)    |
| N2  | C2  | C3  | C4  | -174.0 (6) | C14 | C15 | C16 | C17 | -4 (2)      |
| C1  | O1  | C6  | C5  | -1.1 (7)   | C14 | C26 | C27 | C17 | -4 (2)      |
| C1  | O1  | C6  | C14 | 179.8 (4)  | C17 | C18 | C19 | C14 | 1 (2)       |

|              |            |              |           |
|--------------|------------|--------------|-----------|
| C1 N1 N2 C2  | -0.4 (6)   | C17C28C29C14 | 1 (2)     |
| C1 N1 C20C21 | 1.9 (9)    | C20N1 N2 C2  | 179.8 (5) |
| C1 N1 C20C25 | -176.9 (6) | C20N1 C1 O1  | -1.3 (9)  |
| C1 C3 C4 C5  | 3.6 (7)    | C20N1 C1 C3  | 179.7 (5) |
| C1 C3 C4 C8  | 128.8 (5)  | C20C21C22C23 | -0.4 (10) |
| C2 C3 C4 C5  | 176.0 (6)  | C21C20C25C24 | 0.7 (9)   |
| C2 C3 C4 C8  | -58.8 (8)  | C21C22C23C24 | 0.7 (10)  |
| C3 C4 C5 C6  | -2.5 (7)   | C22C23C24C25 | -0.4 (10) |
| C3 C4 C8 C9  | 113.2 (7)  | C23C24C25C20 | -0.3 (10) |
| C3 C4 C8 C13 | -67.7 (7)  | C25C20C21C22 | -0.4 (9)  |
| C4 C5 C6 O1  | 1.5 (9)    | C15C14C19C18 | -7.3 (18) |
| C4 C5 C6 C14 | -179.6 (5) | C16C17C18C19 | 4 (2)     |
| C4 C8 C9 C10 | 178.9 (6)  | C18C17C16C15 | -3 (2)    |
| C4 C8 C13C12 | -179.4 (5) | C19C14C15C16 | 8.9 (18)  |
| C5 C4 C8 C9  | -124.9 (6) | C26C14C29C28 | 0.2 (18)  |
| C5 C4 C8 C13 | 54.3 (8)   | C27C17C28C29 | -3 (2)    |
| C5 C6 C14C15 | 34.6 (10)  | C28C17C27C26 | 5 (2)     |
| C5 C6 C14C19 | -152.1 (9) | C29C14C26C27 | 1.3 (17)  |

Table 7 Hydrogen Atom Coordinates ( $\text{\AA} \times 10^4$ ) and Isotropic Displacement Parameters ( $\text{\AA}^2 \times 10^3$ ) for 3C.

| Atom | <i>x</i> | <i>y</i> | <i>z</i> | U(eq) |
|------|----------|----------|----------|-------|
| H4   | 3594     | 11208    | 3184     | 61    |
| H5   | 2460     | 11002    | 2976     | 65    |
| H7A  | 5226     | 6395     | 3661     | 149   |
| H7B  | 4793     | 6904     | 4208     | 149   |
| H7C  | 4916     | 9115     | 3684     | 149   |



|      |      |       |      |     |
|------|------|-------|------|-----|
| H9   | 3990 | 12565 | 4382 | 79  |
| H10  | 4051 | 12548 | 5638 | 91  |
| H12  | 2929 | 6393  | 5377 | 81  |
| H13  | 2863 | 6477  | 4117 | 73  |
| H17A | 151  | 9026  | 735  | 91  |
| H17  | 135  | 8946  | 779  | 91  |
| H21  | 2780 | 3155  | 1156 | 74  |
| H22  | 2663 | 22    | 263  | 88  |
| H23  | 3493 | -2615 | 186  | 92  |
| H24  | 4443 | -2135 | 1036 | 102 |
| H25  | 4567 | 964   | 1942 | 89  |
| H15  | 1753 | 12256 | 1907 | 78  |
| H16  | 706  | 12623 | 1279 | 97  |
| H18  | 666  | 4965  | 862  | 101 |
| H19  | 1721 | 4618  | 1549 | 76  |
| H26  | 1388 | 9790  | 2664 | 74  |
| H27  | 353  | 9892  | 1982 | 84  |
| H28  | 886  | 7513  | 214  | 79  |
| H29  | 1907 | 7208  | 879  | 75  |

Table 8 Atomic Occupancy for 3C.

| Atom | Occupancy | Atom | Occupancy | Atom | Occupancy |
|------|-----------|------|-----------|------|-----------|
| H17A | 0.5       | H17  | 0.5       | C15  | 0.445 (9) |
| H15  | 0.445 (9) | C16  | 0.445 (9) | H16  | 0.445 (9) |
| C18  | 0.445 (9) | H18  | 0.445 (9) | C19  | 0.445 (9) |
| H19  | 0.445 (9) | C26  | 0.555 (9) | H26  | 0.555 (9) |
| C27  | 0.555 (9) | H27  | 0.555 (9) | C28  | 0.555 (9) |
| H28  | 0.555 (9) | C29  | 0.555 (9) | H29  | 0.555 (9) |
